# Supplementary material for: RAS-independent ERK activation by constitutively active KSR3 in non-chordate metazoa
Source: PubMed Central journal article supplement (PMC10322840; doi:10.1038/s41467-023-39606-y), 2023-07-05
Supplement: 41467_2023_39606_MOESM3_ESM.pdf [file 41467_2023_39606_MOESM3_ESM.pdf]

## **Description of Additional Supplementary Files**

File Name: Supplementary Data 1

Description: Full alignment of B-RAF, KSR1 and KSR3 protein sequences from various phyla
