# Supplementary material for: RAS-independent ERK activation by constitutively active KSR3 in non-chordate metazoa
Source: PubMed Central journal article supplement (PMC10322840; doi:10.1038/s41467-023-39606-y), 2023-07-05
Supplement: 41467_2023_39606_MOESM4_ESM.pdf [file 41467_2023_39606_MOESM4_ESM.pdf]

|                                              |         |                                                                           |
|----------------------------------------------|---------|---------------------------------------------------------------------------|
| BRAF-Capitella-teleta/1-419                  | -----   |                                                                           |
| BRAF-Priapulus-caudatus/1-368                | -----   |                                                                           |
| CRAF-Homo-sapiens/1-648                      | -----   |                                                                           |
| ARAF-Homo-sapiens/1-606                      | -----   |                                                                           |
| RAF-Caenorhabditis-elegans/1-813             | -----   |                                                                           |
| Raf-Rhipicephalus-sanguineus/1-803           | -----   |                                                                           |
| BRAF-Limulus-caudatus/1-781                  | -----   |                                                                           |
| RAF-Ramazottius-variornatus/1-885            | -----   |                                                                           |
| RAF-Schmidtea-mediterranea/1-737             | -----   |                                                                           |
| RAF-Amphimedon-queenslandica/1-904           | -----   |                                                                           |
| RAF-Clytia-hemispherica/1-792                | -----   |                                                                           |
| BRAF-Crassostrea-gigas/1-688                 | -----   |                                                                           |
| RAF-Nematostella-vectensis/1-730             | -----   |                                                                           |
| RAF-Acropora-millepora/1-729                 | -----   |                                                                           |
| BRAF-Homo-sapiens/1-766                      | -----   |                                                                           |
| BRAF-Danio-erio/1-777                        | -----   |                                                                           |
| BRAF-Eucidaris-tribuloides-partial/1-725     | -----   |                                                                           |
| BRAF-Strongylocentrotus-purpuratus/1-803     | -----   |                                                                           |
| BRAF-Paracentrotus-lividus-RNAseq/1-746      | -----   |                                                                           |
| BRAF-Paracentrotus-lividus-contigEST/1-716   | -----   |                                                                           |
| BRAF-Saccoglossus-kowaleskii/1-733           | -----   |                                                                           |
| RAF-Parastichopus-parvimensis/1-747          | -----   |                                                                           |
| BRAF-Branchiostoma-floridae/1-831            | -----   |                                                                           |
| BRAF-Trichoplax-adherens-partial/1-325       | -----   |                                                                           |
| BRAF-Patiria-miniata-partial/1-819           | -----   |                                                                           |
| KSR1-Caenorhabditis-elegans/1-771            | 1 ----- | MMQTQVASRAGYSNL P 16                                                      |
| KSR2-Caenorhabditis-elegans/1-550            | -----   |                                                                           |
| KSR1-Amphimedon-queenslandica/1-1246         | 1 ----- | MSATT-ATAVYSS- 12                                                         |
| KSR1-Patiria-miniata/1-787                   | -----   |                                                                           |
| KSR1-Anneissia-japonica/1-885                | -----   |                                                                           |
| KSR1-Parastichopus-parvimensis/1-879         | -----   |                                                                           |
| KSR1-Eucidaris-tribuloides/1-873             | -----   |                                                                           |
| KSR1-Strongylocentrotus-purpuratus/1-869     | -----   |                                                                           |
| KSR1-Paracentrotus-lividus/1-848             | -----   |                                                                           |
| KSR1-Trichoplax-adherens/1-966               | -----   |                                                                           |
| KSR1-Schmidtea-mediterranea/1-954            | -----   |                                                                           |
| KSR1-Priapulus-caudatus-partial/1-248        | -----   |                                                                           |
| KSR1-Clytia-hemispherica/1-881               | -----   |                                                                           |
| KSR1-Nematostella-vectensis-partial/1-917    | 1 ----- | MEALDFHRLVSVAR P RQRRYRLT SQ P AMDVNR SMDS I LDNME G HSKRRSSYSNFE HSP K 4 |
| KSR1-Acropora-millepora/1-957                | 1 ----- | MS SNNNA- 56                                                              |
| KSR1-Drosophila-melanogaster/1-966           | 1 ----- | MSDS- 7                                                                   |
| KSR1-Crassostrea-gigas/1-859                 | 1 ----- | MSDS- 4                                                                   |
| KSR1-Saccoglossus-kowaleskii/1-898           | -----   |                                                                           |
| KSR1-Branchiostoma-floridae/1-865            | 1 ----- | MG- 2                                                                     |
| KSR1-Capitella-teleta/1-536                  | -----   |                                                                           |
| KSR1-Rhipicephalus-sanguineus/1-864          | 1 ----- | MA- 2                                                                     |
| KSR1-Limulus-polyphemus/1-603                | 1 ----- | MA- 2                                                                     |
| KSR3-Ramazottius-variornatus-partial/1-451   | -----   |                                                                           |
| KSR2-Homo-sapiens/1-950                      | 1 ----- | MDE- 3                                                                    |
| KSR2-Danio-erio/1-966                        | 1 ----- | MDE- 3                                                                    |
| KSR1-Homo-sapiens/1-923                      | 1 ----- | MDRAALRA- AAM G EKKE- 16                                                  |
| KSR1-Danio-erio/1-898                        | -----   |                                                                           |
| KSR3-Clytia-hemispherica/1-517               | -----   |                                                                           |
| KSR3-Schmidtea-mediterranea/1-666            | -----   |                                                                           |
| KSR3-Rhipicephalus-sanguineus/1-675          | -----   |                                                                           |
| KSR3-Limulus-polyphemus/1-686                | -----   |                                                                           |
| KSR3-Limulus-polyphemus-isoformB/1-671       | -----   |                                                                           |
| KSR3-Lingula-anatina/1-626                   | -----   |                                                                           |
| KSR3-Crassostrea-gigas/1-585                 | -----   |                                                                           |
| KSR3-Nematostella-vectensis/1-640            | -----   |                                                                           |
| KSR3-Acropora-millepora/1-634                | -----   |                                                                           |
| KSR3-Priapulus-caudatus/1-533                | -----   |                                                                           |
| KSR3-Saccoglossus-kowaleskii/1-591           | -----   |                                                                           |
| KSR3-Ptychodera-flava/1-629                  | -----   |                                                                           |
| KSR3-Trichoplax-adherens/1-510               | -----   |                                                                           |
| KSR3-Capitella-teleta/1-642                  | -----   |                                                                           |
| KSR3-Eucidaris-tribuloides/1-545             | -----   |                                                                           |
| KSR3-Strongylocentrotus-purpuratus/1-602     | -----   |                                                                           |
| KSR3-Paracentrotus-lividus-RNAseq/1-600      | -----   |                                                                           |
| KSR3-Notospermus-geniculatus/1-691           | -----   |                                                                           |
| KSR3-Aplysia-californica/1-405               | -----   |                                                                           |
| KSR3-Amphiura-filiformis-partial/1-642       | -----   |                                                                           |
| KSR3-Platynereis-dumerilii/1-704             | -----   |                                                                           |
| KSR3-Patiria-miniata/1-779                   | -----   |                                                                           |
| KSR3-Anneissia-japonica/1-590                | -----   |                                                                           |
| KSR3-Parastichopus-parvimensis-partial/1-330 | -----   |                                                                           |





BRAF-Capitella-teleta/1-419 1-----MEDIQ-----LRS--STTSP L N G V-----TF-- 19  
 BRAF-Priapulul-caudatus/1-368 1-----MAAVK-----S P-----SL-- 9  
 CRAF-Homo-sapiens/1-648 -----  
 ARAF-Homo-sapiens/1-606 -----  
 RAF-Caenorhabditis-elegans/1-813 -----  
 Raf-Rhipicephalus-sanguineus/1-803 1-----MAVVP EQ----- 7  
 BRAF-Limulus-caudatus/1-781 1-----MQTA----- 4  
 RAF-Ramazzottius-variornatus/1-885 6-----ATG K S S Q-----ASKET I P E E M A V V P D L L R S C T N S L N G S-----LH-- 41  
 RAF-Schmidtea-mediterranea/1-737 -----  
 RAF-Amphimedon-queenslandica/1-904 -----  
 RAF-Clytia-hemispherica/1-792 1-----MAATSEN N L S-----N I A R I S G G D L T-----R--E--HR-- 25  
 BRAF-Crassostrea-gigas/1-688 -----  
 RAF-Nematostella-vectensis/1-730 1-----MMA-----VANS-----HR-- 9  
 RAF-Acropora-millepora/1-729 1-----MA-----VDAP----- 6  
 BRAF-Homo-sapiens/1-766 1-----MAALS G-----G G G G G A E P G-QALFN G-DME-----P-----E-- 26  
 BRAF-Danio-erio/1-777 1-----MAALSS--A-----ESP--P P V F N G-DTM-----NRDP-----ER-- 25  
 BRAF-Eucidaris-tribuloides-partial/1-725 1-----P I-----V-----RES P-----SF-- 9  
 BRAF-Strongylocentrotus-purpuratus/1-803 -----  
 BRAF-Paracentrotus-lividus-RNAseq/1-746 1-----MAT G S E F S A P F S G G P F-----M-----S E S P-----SC-- 23  
 BRAF-Paracentrotus-lividus-contigEST/1-716 1-----M G G P T-----S----- 6  
 BRAF-Saccoglossus-kowaleskii/1-733 -----  
 RAF-Parastichopus-parvimensis/1-747 -----  
 BRAF-Branchiostoma-floridae/1-831 1-----MNHVTS--RRG S N-----M-AVAV P G V T V Y-----G S D P-----N-- 27  
 BRAF-Trichoplax-adherens-partial/1-325 -----  
 BRAF-Patiria-miniata-partial/1-819 9-----ATFHRADQEEHSG T F G K V P F-R P Q P P S I F V E-----P K S S-----TV-- 44  
 KSR1-Caenorhabditis-elegans/1-771 46-----F L T S S Y E E D A K S V E R K I-----F S A V-----Y Q M T K I G L I D----- 76  
 KSR2-Caenorhabditis-elegans/1-550 -----  
 KSR1-Amphimedon-queenslandica/1-1246 57--P S D G S D A L K E N I V L V E N K L-----M K L F S R Q L M H-K H I C L K E L I N A G G V S H F D F 105  
 KSR1-Patiria-miniata/1-787 -----  
 KSR1-Anneissia-japonica/1-885 47 S I S N D R T P Q E I G F Q E I R T A E N K L-----I M M F G K Q L A I-K S G T D----- 84  
 KSR1-Parastichopus-parvimensis/1-879 45-----S G F T Q Q G I K A L E N K V-----I Q M F G R Q L A I-R H R Q N D----- 75  
 KSR1-Eucidaris-tribuloides/1-873 37-----S D L T L H E M K K L E G R L-----Y Q L F G R Q L A I-K D R L D A----- 67  
 KSR1-Strongylocentrotus-purpuratus/1-869 37-----S E L T Q Y E I R N V E G R L-----I H L F G R Q L A S S K H G M D T----- 68  
 KSR1-Paracentrotus-lividus/1-848 32-----S E L T Q Y E I R N V E G R L-----I N L F G R Q L A-S K H G M D T----- 62  
 KSR1-Trichoplax-adherens/1-966 39-----D V T F D F I Q Q L R A L E G K V-----I K Y I S Q L L E-I A N G I P P N S P----- 76  
 KSR1-Schmidtea-mediterranea/1-954 37-----N S K S K I I A L E I K D A E N K V-----F E Y I S S Q I T T-I G N A S E----- 70  
 KSR1-Priapulul-caudatus-partial/1-248 -----  
 KSR1-Clytia-hemispherica/1-881 32-----E A R S E I I T S E I S D L E G K L-----M V L F A S Q I K S-K S K I V N----- 65  
 KSR1-Nematostella-vectensis-partial/1-917 49-----A T N T N L I Q Q E I R T V E G K L-----V K L F S R M L V A-K Q T A N R S----- 83  
 KSR1-Acropora-millepora/1-957 104-----S T N S D L I Q Q E I R T L E G K L-----V K L F S R Q L V T-K Q K C G E D----- 138  
 KSR1-Drosophila-melanogaster/1-966 55-----A I S S T L T Q Q E I R C L E S K L-----V R Y F S E L L L A-K M R L N E-R I P----- 91  
 KSR1-Crassostrea-gigas/1-859 41-----A A T N D L T Q N E I R E Q E S K L-----L K L F S K Q L V Q-T T K A D P----- 74  
 KSR1-Saccoglossus-kowaleskii/1-898 37-----H N S S L T I Q K E I R Q A E S K L-----L S L F C K Q L A I-K T E A O H N G V P----- 74  
 KSR1-Branchiostoma-floridae/1-865 39-----E T S H D L T Q E I R T L E G K L-----V K L F S K Q L Q A-K N K V P E----- 72  
 KSR1-Capitella-teleta/1-536 -----  
 KSR1-Rhipicephalus-sanguineus/1-864 39-----E T S A E L T Q H E I R A L E T K L-----I K L F S R Q V L A-K R K C S D----- 72  
 KSR1-Limulus-polyphemus/1-603 39-----P P N A E L T Q H E I K A L E S K L-----L K L F S K Q L V A-K R K C V D----- 72  
 KSR3-Ramazzottius-variornatus-partial/1-451 -----  
 KSR2-Homo-sapiens/1-950 46-----A T S N D L T Q K E I R T L E S K L-----V K Y F S R Q L S C-K K K V A L----- 79  
 KSR2-Danio-erio/1-966 45-----A T S N D L T Q K E I R T L E G K L-----V K Y F S R Q L S Y-K R K V S L----- 78  
 KSR1-Homo-sapiens/1-923 63-----A V S N D L T Q Q E I R T L E A K L-----V R Y I C K Q R Q C-K L S V A P----- 96  
 KSR1-Danio-erio/1-898 1-----M K Y I C K Q L Q C-K Q K V P D----- 16  
 KSR3-Clytia-hemispherica/1-517 -----  
 KSR3-Schmidtea-mediterranea/1-666 -----  
 KSR3-Rhipicephalus-sanguineus/1-675 -----  
 KSR3-Limulus-polyphemus/1-686 -----  
 KSR3-Limulus-polyphemus-isoformB/1-671 -----  
 KSR3-Lingula-anatina/1-626 -----  
 KSR3-Crassostrea-gigas/1-585 -----  
 KSR3-Nematostella-vectensis/1-640 -----  
 KSR3-Acropora-millepora/1-634 -----  
 KSR3-Priapulul-caudatus/1-533 -----  
 KSR3-Saccoglossus-kowaleskii/1-591 -----  
 KSR3-Ptychodera-flava/1-629 -----  
 KSR3-Trichoplax-adherens/1-510 -----  
 KSR3-Capitella-teleta/1-642 -----  
 KSR3-Eucidaris-tribuloides/1-545 -----  
 KSR3-Strongylocentrotus-purpuratus/1-602 -----  
 KSR3-Paracentrotus-lividus-RNAseq/1-600 -----  
 KSR3-Notospermus-geniculatus/1-691 -----  
 KSR3-Aplysia-californica/1-405 -----  
 KSR3-Amphiura-filiformis-partial/1-642 -----  
 KSR3-Platynereis-dumerilii/1-704 -----  
 KSR3-Patiria-miniata/1-779 -----  
 KSR3-Anneissia-japonica/1-590 -----  
 KSR3-Parastichopus-parvimensis-partial/1-330 -----



BRAF-Capitella-teleta/1-419  
 BRAF-Priapul-us-caudatus/1-368  
 CRAF-Homo-sapiens/1-648  
 ARAF-Homo-sapiens/1-606  
 RAF-Caenorhabditis-elegans/1-813  
 Raf-Rhipicephalus-sanguineus/1-803  
 BRAF-Limulus-caudatus/1-781  
 RAF-Ramazzottius-variornatus/1-885  
 RAF-Schmidtea-mediterranea/1-737  
 RAF-Amphimedon-queenslandica/1-904  
 RAF-Clytia-hemispherica/1-792  
 BRAF-Crassostrea-gigas/1-688  
 RAF-Nematostella-vectensis/1-730  
 RAF-Acropora-millepora/1-729  
 BRAF-Homo-sapiens/1-766  
 BRAF-Danio-erio/1-777  
 BRAF-Eucidaris-tribuloides-partial/1-725  
 BRAF-Strongylocentrotus-purpuratus/1-803  
 BRAF-Paracentrotus-lividus-RNAseq/1-746  
 BRAF-Paracentrotus-lividus-contigEST/1-716  
 BRAF-Saccoglossus-kowaleskii/1-733  
 RAF-Parastichopus-parvimensis/1-747  
 BRAF-Branchiostoma-floridae/1-831  
 BRAF-Trichoplax-adherens-partial/1-325  
 BRAF-Patiria-miniata-partial/1-819  
 KSR1-Caenorhabditis-elegans/1-771  
 KSR2-Caenorhabditis-elegans/1-550  
 KSR1-Amphimedon-queenslandica/1-1246  
 KSR1-Patiria-miniata/1-787  
 KSR1-Anneissia-japonica/1-885  
 KSR1-Parastichopus-parvimensis/1-879  
 KSR1-Eucidaris-tribuloides/1-873  
 KSR1-Strongylocentrotus-purpuratus/1-869  
 KSR1-Paracentrotus-lividus/1-848  
 KSR1-Trichoplax-adherens/1-966  
 KSR1-Schmidtea-mediterranea/1-954  
 KSR1-Priapul-us-caudatus-partial/1-248  
 KSR1-Clytia-hemispherica/1-881  
 KSR1-Nematostella-vectensis-partial/1-917  
 KSR1-Acropora-millepora/1-957  
 KSR1-Drosophila-melanogaster/1-966  
 KSR1-Crassostrea-gigas/1-859  
 KSR1-Saccoglossus-kowaleskii/1-898  
 KSR1-Branchiostoma-floridae/1-865  
 KSR1-Capitella-teleta/1-536  
 KSR1-Rhipicephalus-sanguineus/1-864  
 KSR1-Limulus-polyphemus/1-603  
 KSR3-Ramazzottius-variornatus-partial/1-451  
 KSR2-Homo-sapiens/1-950  
 KSR2-Danio-erio/1-966  
 KSR1-Homo-sapiens/1-923  
 KSR1-Danio-erio/1-898  
 KSR3-Clytia-hemispherica/1-517  
 KSR3-Schmidtea-mediterranea/1-666  
 KSR3-Rhipicephalus-sanguineus/1-675  
 KSR3-Limulus-polyphemus/1-686  
 KSR3-Limulus-polyphemus-isoformB/1-671  
 KSR3-Lingula-anatina/1-626  
 KSR3-Crassostrea-gigas/1-585  
 KSR3-Nematostella-vectensis/1-640  
 KSR3-Acropora-millepora/1-634  
 KSR3-Priapul-us-caudatus/1-533  
 KSR3-Saccoglossus-kowaleskii/1-591  
 KSR3-Ptychodera-flava/1-629  
 KSR3-Trichoplax-adherens/1-510  
 KSR3-Capitella-teleta/1-642  
 KSR3-Eucidaris-tribuloides/1-545  
 KSR3-Strongylocentrotus-purpuratus/1-602  
 KSR3-Paracentrotus-lividus-RNAseq/1-600  
 KSR3-Notospermus-geniculatus/1-691  
 KSR3-Aplysia-californica/1-405  
 KSR3-Amphiura-filiformis-partial/1-642  
 KSR3-Platynereis-dumerilii/1-704  
 KSR3-Patiria-miniata/1-779  
 KSR3-Anneissia-japonica/1-590  
 KSR3-Parastichopus-parvimensis-partial/1-330

20 T I - - - - - G T G - - - - - E D S A A G C D Q G D P E T L E E - - E I K N I K S V I R I T T Q K L V E L 60  
 10 N G S V P N L S S S - - - - - Y G S S L E D V D L F E A T T L Q D - - E V R N I Q S V I R L T K E N L E Q L 56  
 -----  
 -----  
 -----  
 8 - - - - - P Y N G S V P P - - L N S P P A S Y E Q D D R V A L S G - - E L R N I R S M I R L T K E N L E A L 52  
 5 - - - - - G A N - - - - - N M T L T V C S P P V E - - E L Q N I R S M I R L T R G N L E A L 38  
 42 S L S I D S M S D S L D - - - - - P E - D P V T I P M T L A D R V A E - - E V R N Y S L M I E V T R G S L E M L 89  
 1 - - - - - - - - - - M S S K I L Q E R Y D L I Q K K V S - - E F Q L I N K V L Q N K I - - - I H L 34  
 1 - - - - - - - - - - M N M E S A Q - - - F L E V H N S S S R - - E V Q A I R Q V I R S T R T T L D E F 36  
 26 S L T I D N L N C G A E V D T G H F Q S N G - - I - - R A S Q I L S - - E A Q N V E E L F Q L T S E Q L Q E M 74  
 1 - - - - - - - - - - - - - - - M K I P R I C - - A I R N I R K V I Q L T K D S L D E L 26  
 10 D - - - - - - - - - - H P C A F N G E E - - N E D I S N S H E S - - E V R T V Q H V I R L T K E N L D Q L 48  
 7 - - - - - - - - - - Q T L H F E - D F - - D - Q N C T N H E V - - E V N S L Q K V I K L T K E N L D K I 42  
 27 - - - - - A G - - - - - A G A G A - A A - - S S A A D P A I P E - - E V W N I K Q M I K L T Q E H I E A L 64  
 26 D P G L D E L G A G L E - P A C P G E - A A - - I P E C Q Q G I P E - - E I W N I K Q M I K L T Q E H L E A L 74  
 10 D N G - - - - - - - - - - H S D - Y F - - S M E E S T K - T E - - Q L R A I Q Q H M E L T K K N I E K L 45  
 1 - - - - - - - - - - - - - - - M G D R T K - T E - - Q L N V I H M H M E L K K K N I E E L 27  
 24 D N G - - - - - - - - - - H S D - Y F - - K M A D R T K - T D - - Q L N V I H M H M E L K K K N I E E L 59  
 7 - - - - - - - - - - - - - - - G H - I S - - R V K C Y P H A Y G V K K K N I E E L 29  
 -----  
 -----  
 -----  
 28 L Q G - - - - - - - - - - H Q D - E E - - I M D E V Q N V R K - - V I - - - - - N L T R Q N L E A L 57  
 -----  
 -----  
 -----  
 45 T H G - - - - - - - - - - L Y - - - - - I A T V L Q R T G R - - T M F L L A T S Q K T P S R H L A P A 78  
 77 - - - - - R E K R - - - E I N A I W F T F V G L S A Q N I R H L E I - C S I T D F N A L F S I T N Q E L R S L 122  
 -----  
 -----  
 -----  
 106 E Q T N D E L D S L - - I S F K M F L T V T G L E E L S V K S L S S E K E K L S V D R L F Q M T P Q E L Q Y L 158  
 1 - - - - - - - - - - - - - - - M L D - - K L Q D L S E L L E M T E Y D I R A Q 22  
 85 F Q G T S V E S D Y - - P S I A D W M C V V N I R Q D V L Q K L C Q - - P Y G T L K G L L D I E D S E M R E L 135  
 76 N E I N E E L E Q F - - P N F Q M W L Y V M D I H D E A K E L M A T - - K L K T L M A L V E L P E S E V K S L 126  
 68 D L L C E E H K R Y - - P N F K Q W L H V V D I H L E A L E M L S D - - K L Q T L N S L L D M G E S E T R T I 118  
 69 G S C S E L N R Y - - P N F K Q W L H V V D V H P P A A E L L M E - - K V Q N L S H L I K H G E S E I R T I 119  
 63 G S C S E L N R Y - - P N F K Q W L H V V N V H P A S E M L Q O - - K L Q N L S H L I K L G E S E I R T I 113  
 77 - S I A D K F Y Q Y - - P K L N Q W L E V V G M E S S T A K A I C G - - L Q L P L S T M L N M Q E E D M R Q M 126  
 71 E D S K I C M K E F - - P K S E I C Y R C I G L D D D T I Q G L L K I - R N I S F P D F L G M D P V E V I N L 122  
 -----  
 -----  
 -----  
 66 - - Q E H A A R F Y - - P K L S Q F L Y V V D I D E E M R E T L V N - - R C S L V E E L F E F S N E R L A G I 114  
 84 Q V N H V E L P S Y - - P S L V Q W L Q V V G I N E A A I K E F V A - - K C G T V E G L L S L P G D K I N T I 134  
 139 W N H C E K L R Y Y - - P R L E Q W L Q V V G I N E A A I K S L E E - - K C N T I E G L L S L S D E K V R A V 189  
 92 A N G L V P H T T G - - N E L R Q W L R V V G L S Q G T L T A C L A - - R L T T L E Q S L R L S D E E I R Q L 142  
 75 Q H T Q E K L S G Y - - P K T D Q W L T V V G L P E N A V Q E I L K - - R D I K L G T L L E M T E E E V Q S L 125  
 75 S A D I R A L E S Y - - P K L E Q W L E V V D I N K T T A K D V C S - - R L K K L E S L I D L P D T D I N K L 125  
 73 D Q R T S E L Q R Y - - P S V K Q W L E V V D I Q P V A I R G I E N - - K K I S L E D L L K M T K V E I V S L 123  
 -----  
 -----  
 -----  
 73 C E N A S E L K N Y - - P K L L L W L K V V G L T P N S I Q G L S N - - K F T T F D D M L E K P E Q E I K G Y 123  
 73 A G T I Q Q L T Q Y - - P R L R Q W L C V V G I C K S - - - - - - - - - - - - - - - - - - - - - - - - - 97  
 -----  
 -----  
 -----  
 80 Q E R N A E L D G F - - P Q L R H W F R I V D V R K E V L E E I S P - - G Q L S L E D L L E M T D E Q V C E T 130  
 79 Q E R N A E L D G F - - P R L G H W F R I V N M R K E V L E E I S P - - G E L T L E A L L E M V D D Q V C E E 129  
 97 G E R T P E L N S Y - - P R F S D W L Y T F N V R P E V V Q E I - P - - R D L T L D A L L E M N E A K V K E T 146  
 17 T E R P A A L N S Y - - P R L E D W L R I I N V R P A L I E A V - N - - V K L S L D A L L Q M P I I Q V K E T 66

















BRAF-Capitella-teleta/1-419 157 ----- NLLAS P Q M P R S P L R N M I K A N L P N ----- 179  
 BRAF-Priapulus-caudatus/1-368 136 ----- S P L R S F I R A H L P N ----- 148  
 CRAF-Homo-sapiens/1-648 46 ----- G K L T D P S K T S N T I R V F L P N ----- 64  
 ARAF-Homo-sapiens/1-606 9 ----- A N G A E P S R A V G T V K V Y L P N ----- 27  
 RAF-Caenorhabditis-elegans/1-813 71 ----- G A G T S D K E P P K F K Y K M I M V H L P F ----- 93  
 Raf-Rhipicephalus-sanguineus/1-803 136 ----- M K S V V R A F L P N ----- 146  
 BRAF-Limulus-caudatus/1-781 139 ----- L - K V V R A F L P Y ----- 148  
 RAF-Ramazzottius-variornatus/1-885 212 ----- S A S G S T P Q T P A I P K K I I M A E L P N ----- 234  
 RAF-Schmidtea-mediterranea/1-737 111 ----- H S A A T N T T G V S T K C F L R A N L P D ----- 132  
 RAF-Amphimedon-queenslandica/1-904 135 ----- D T V A P S S P V T T H A A L I R A H L P E ----- 156  
 RAF-Clytia-hemispherica/1-792 171 ----- S S L R A H I R A F L P N ----- 183  
 BRAF-Crassostrea-gigas/1-688 93 ----- S I - - - P S P K P V H G I I K A Y L P N ----- 110  
 RAF-Nematostella-vectensis/1-730 128 ----- L R A H V R A F L P N ----- 138  
 RAF-Acropora-millepora/1-729 122 ----- Q T L R T H I R V N L P N ----- 134  
 BRAF-Homo-sapiens/1-766 153 ----- Q K P I V R V F L P N ----- 163  
 BRAF-Danio-erio/1-777 163 ----- Q K P I V R V F L P N ----- 173  
 BRAF-Eucidaris-tribuloides-partial/1-725 125 ----- L S Q S V R A H L P N ----- 135  
 BRAF-Strongylocentrotus-purpuratus/1-803 114 ----- L S Q S V R A F L P N ----- 124  
 BRAF-Paracentrotus-lividus-RNAseq/1-746 145 ----- L S Q S V R A F L P N ----- 155  
 BRAF-Paracentrotus-lividus-contigEST/1-716 115 ----- L S Q S V R A F L P N ----- 125  
 BRAF-Saccoglossus-kowaleskii/1-733 81 ----- A N L T R V C L P N ----- 90  
 RAF-Parastichopus-parvimensis/1-747 101 ----- N A P V R A Y L P N ----- 110  
 BRAF-Branchiostoma-floridae/1-831 133 ----- Q A T V F A H L P N ----- 142  
 BRAF-Trichoplax-adherens-partial/1-325  
 BRAF-Patiria-miniata-partial/1-819 192 ----- S L - - - P N K Q R T S D P L F F A I P N ----- 209  
 KSR1-Caenorhabditis-elegans/1-771  
 KSR2-Caenorhabditis-elegans/1-550  
 KSR1-Amphimedon-queenslandica/1-1246 349 ----- K K I G H T R S H S N P P L A N - L I M P E A V P E N S V P E Y R S P S P P 385  
 KSR1-Patiria-miniata/1-787 244 -- N Q Y T V T P P T T P K Q W V K K - - - T A A K G T P P P N K - K M I T V N L P L P E S G L K R S K S T 291  
 KSR1-Anneissia-japonica/1-885 228 -- L L D S V A P P P T P T - S K - R - - - T K S K G T P P P S K - K V F N V - H G V I L D G S S - S L - - - 269  
 KSR1-Parastichopus-parvimensis/1-879 239 -- K R F N V T P P S T P T - I K - K - - - N K P K G T P P P N K - K L M Q L - P P V S Q L K R S K S S - - - 281  
 KSR1-Eucidaris-tribuloides/1-873 216 -- I P P M S T P P L T P T - S K R V - - - G K S K G T P P P I K - K L N L P - L T D G Q Q P I W S S K - - - 259  
 KSR1-Strongylocentrotus-purpuratus/1-869 225 -- L P P M P T P P H T P T - F N K R - - - V K G K T P P L T - - - R K T N - L P L P A Q S N W N S D - - - 265  
 KSR1-Paracentrotus-lividus/1-848 219 -- L P P M P T P P H T P T - F S K R - - - G K G K G T P P P S K - R L N N H - L P L P A P S N W N S V - - - 262  
 KSR1-Trichoplax-adherens/1-966 227 V V K S S T F S - P S P S S Y C I A N S L D S G A S P T T P Q V P A - N Y Y K - - - - - D S S P S V S D 271  
 KSR1-Schmidtea-mediterranea/1-954 270 N T T L S G I T C N D D K S Y L S T N Q L A D I N S L S V P N T P N - - - - - V Q K S R S V G G - 312  
 KSR1-Priapulus-caudatus-partial/1-248  
 KSR1-Clytia-hemispherica/1-881 208 ----- P S P A - R S V - - - - - S S I P R S R S D 223  
 KSR1-Nematostella-vectensis-partial/1-917 222 --- L - - - S A S D M S D A M V S P - - - R H S - - - P R P L - I S P V I L Q Y P V T S G L K R S R S D 261  
 KSR1-Acropora-millepora/1-957 278 --- L S T L S S D T D T A P S F K - - - Q H S - - - P L P A - H F I - V R N G S P S P L K R S V S D 319  
 KSR1-Drosophila-melanogaster/1-966 259 --- T L T L T P S P P N S - - - - - - - - - - - P F T P S S G L 277  
 KSR1-Crassostrea-gigas/1-859 240 ----- S R I P S T P P P P S - R I K - V K S P S T A V P I T S S K S - 268  
 KSR1-Saccoglossus-kowaleskii/1-898 215 --- I W K I S P P P T P S S M V K K - - - G K M P S K G T P P P - K K K - L V V P E N N L K R S K S D E T 260  
 KSR1-Branchiostoma-floridae/1-865 204 ----- D T H D - R T L - - - - - Y P S T G D S E T 219  
 KSR1-Capitella-teleta/1-536  
 KSR1-Rhipicephalus-sanguineus/1-864 222 ----- G S P S - G S L - I A L P D A L P P L T K S R S H 244  
 KSR1-Limulus-polyphemus/1-603  
 KSR2-Ramazzottius-variornatus-partial/1-451  
 KSR2-Homo-sapiens/1-950 265 P N I V T T V T P P G T P P M R K K - - - N K L K P P G T P P P S S - R K L I H L I P G - F T A L H R S K S H 314  
 KSR2-Danio-erio/1-966 272 P L V V N T M T P P G T P Q V R R R - - - N K L K A P G T P P P A S - R K L I H L L P G - F T A L H R S K S H 321  
 KSR1-Homo-sapiens/1-923 264 A L - H S F I T P P T P Q L R R H - - - T K L K P P R T P P P P S - R K V F Q L L P S - F P T L T R S K S H 312  
 KSR1-Danio-erio/1-898 185 R L H G H T S T P P I T P S R R R - - - H R L K P P C T P P P P S - R K V L H L L P N - I - T L T R S K S H 233  
 KSR3-Clytia-hemispherica/1-517  
 KSR3-Schmidtea-mediterranea/1-666  
 KSR3-Rhipicephalus-sanguineus/1-675 1 M V - - V L C L V Y - - - - - - - - - - - S R P V - R P D S - - - 16  
 KSR3-Limulus-polyphemus/1-686  
 KSR3-Limulus-polyphemus-isoformB/1-671  
 KSR3-Lingula-anatina/1-626  
 KSR3-Crassostrea-gigas/1-585  
 KSR3-Nematostella-vectensis/1-640  
 KSR3-Acropora-millepora/1-634  
 KSR3-Priapulus-caudatus/1-533  
 KSR3-Saccoglossus-kowaleskii/1-591 1 - - - - - - - - - - - - - - - M S - T E A D A D S M - Q 11  
 KSR3-Ptychodera-flava/1-629 1 - - - - - M L F R S - H N I F A S R V A - I E A G K T S L - P - 23  
 KSR3-Trichoplax-adherens/1-510  
 KSR3-Capitella-teleta/1-642  
 KSR3-Eucidaris-tribuloides/1-545 1 - - - - - - - - - - - - - - - M - Q P K E - - - - - 5  
 KSR3-Strongylocentrotus-purpuratus/1-602 1 - - - - - - - - - - - - - - - M - Q P K E - - - - - 5  
 KSR3-Paracentrotus-lividus-RNAseq/1-600 1 - - - - - - - - - - - - - - - M - Q P K E - - - - - 5  
 KSR3-Notospermus-geniculatus/1-691 1 - - - - - - - - - - - - - - - - - - - - M - Q - 2  
 KSR3-Aplysia-californica/1-405  
 KSR3-Amphiura-filiformis-partial/1-642  
 KSR3-Platynereis-dumerilii/1-704  
 KSR3-Patiria-miniata/1-779 12 R L - - S W C V V D - - - - - - - - - - - Q V T P F R Q - H H I F H V L R M - F P E E R I H L - Q 44  
 KSR3-Anneissia-japonica/1-590  
 KSR3-Parastichopus-parvimensis-partial/1-330



|                                                     |     |                                                             |                                 |     |
|-----------------------------------------------------|-----|-------------------------------------------------------------|---------------------------------|-----|
| <i>BRAF-Capitella-teleta/1-419</i>                  | 180 | -----                                                       | QKQTCIQV-----                   | 187 |
| <i>BRAF-Priapulus-caudatus/1-368</i>                | 149 | -----                                                       | QQRTSVSV-----                   | 156 |
| <i>CRAF-Homo-sapiens/1-648</i>                      | 65  | -----                                                       | KQRTVVNV-----                   | 72  |
| <i>ARAF-Homo-sapiens/1-606</i>                      | 28  | -----                                                       | KQRTVVTV-----                   | 35  |
| <i>RAF-Caenorhabditis-elegans/1-813</i>             | 94  | -----                                                       | DQHSRVEV-----                   | 101 |
| <i>Raf-Rhipicephalus-sanguineus/1-803</i>           | 147 | -----                                                       | QQRRTVQV-----                   | 154 |
| <i>BRAF-Limulus-caudatus/1-781</i>                  | 149 | -----                                                       | QQRSTVQV-----                   | 156 |
| <i>RAF-Ramazzottius-variornatus/1-885</i>           | 235 | -----                                                       | NQKTTVEA-----                   | 242 |
| <i>RAF-Schmidtea-mediterranea/1-737</i>             | 133 | -----                                                       | NQMTSVEV-----                   | 140 |
| <i>RAF-Amphimedon-queenslandica/1-904</i>           | 157 | -----                                                       | QQR T I V P I-----              | 164 |
| <i>RAF-Clytia-hemispherica/1-792</i>                | 184 | -----                                                       | NQRTMIKY-----                   | 191 |
| <i>BRAF-Crassostrea-gigas/1-688</i>                 | 111 | -----                                                       | EQFSLVKI-----                   | 118 |
| <i>RAF-Nematostella-vectensis/1-730</i>             | 139 | -----                                                       | QQR T M I K C-----              | 146 |
| <i>RAF-Acropora-millepora/1-729</i>                 | 135 | -----                                                       | QQYTVLKC-----                   | 142 |
| <i>BRAF-Homo-sapiens/1-766</i>                      | 164 | -----                                                       | KQRTVVPA-----                   | 171 |
| <i>BRAF-Danio-erio/1-777</i>                        | 174 | -----                                                       | KQRTVVPA-----                   | 181 |
| <i>BRAF-Eucidaris-tribuloides-partial/1-725</i>     | 136 | -----                                                       | QQR T S V L A-----              | 143 |
| <i>BRAF-Strongylocentrotus-purpuratus/1-803</i>     | 125 | -----                                                       | QQR T S V L A-----              | 132 |
| <i>BRAF-Paracentrotus-lividus-RNAseq/1-746</i>      | 156 | -----                                                       | QQR T S V L A-----              | 163 |
| <i>BRAF-Paracentrotus-lividus-contigEST/1-716</i>   | 126 | -----                                                       | QQR T S V L A-----              | 133 |
| <i>BRAF-Saccoglossus-kowaleskii/1-733</i>           | 91  | -----                                                       | QQR T T V V A-----              | 98  |
| <i>RAF-Parastichopus-parvimensis/1-747</i>          | 111 | -----                                                       | KQRTSVLA-----                   | 118 |
| <i>BRAF-Branchiostoma-floridae/1-831</i>            | 143 | -----                                                       | HQRTRVQC-----                   | 150 |
| <i>BRAF-Trichoplax-adherens-partial/1-325</i>       |     |                                                             |                                 |     |
| <i>BRAF-Patiria-miniata-partial/1-819</i>           | 210 | -----                                                       | LMSHYRSHLKVLC-----              | 222 |
| <i>KSR1-Caenorhabditis-elegans/1-771</i>            |     |                                                             |                                 |     |
| <i>KSR2-Caenorhabditis-elegans/1-550</i>            |     |                                                             |                                 |     |
| <i>KSR1-Amphimedon-queenslandica/1-1246</i>         | 386 | YYNGHAPPTRTGSHPSIIHNSIANSNQS LANSTSTKSHPQVRR LMA GNYNFSR-SI | 440                             |     |
| <i>KSR1-Patiria-miniata/1-787</i>                   | 292 | E-----                                                      | ASLPHRIDIEGGGS-----             | 307 |
| <i>KSR1-Anneissia-japonica/1-885</i>                | 270 | -----                                                       | PSRTQVRV-----                   | 279 |
| <i>KSR1-Parastichopus-parvimensis/1-879</i>         | 282 | -----                                                       | EVSPHKVDM SVV-----              | 302 |
| <i>KSR1-Eucidaris-tribuloides/1-873</i>             | 260 | -----                                                       | ST-----                         | 264 |
| <i>KSR1-Strongylocentrotus-purpuratus/1-869</i>     | 266 | -----                                                       | N-----                          | 268 |
| <i>KSR1-Paracentrotus-lividus/1-848</i>             | 263 | -----                                                       | D-----                          | 265 |
| <i>KSR1-Trichoplax-adherens/1-966</i>               | 272 | I-----                                                      | NAGLLENNHNVD EATV-----          | 295 |
| <i>KSR1-Schmidtea-mediterranea/1-954</i>            | 313 | S-----                                                      | EEILTDLPNNIVNRST-----           | 342 |
| <i>KSR1-Priapulus-caudatus-partial/1-248</i>        | 1   | -----                                                       | -----                           | 7   |
| <i>KSR1-Clytia-hemispherica/1-881</i>               | 224 | D-----                                                      | ANVQQR IHR GST-----             | 244 |
| <i>KSR1-Nematostella-vectensis-partial/1-917</i>    | 262 | E-----                                                      | ANICNR IISDVT-----              | 281 |
| <i>KSR1-Acropora-millepora/1-957</i>                | 320 | E-----                                                      | VNL AHR I H I T - N-----        | 338 |
| <i>KSR1-Drosophila-melanogaster/1-966</i>           | 278 | S-----                                                      | SS-----                         | 285 |
| <i>KSR1-Crassostrea-gigas/1-859</i>                 | 269 | Y-----                                                      | TNLHTNLH I KVV-----             | 289 |
| <i>KSR1-Saccoglossus-kowaleskii/1-898</i>           | 261 | -----                                                       | SLL-YK VNS-----                 | 270 |
| <i>KSR1-Branchiostoma-floridae/1-865</i>            | 220 | Y-----                                                      | ISEDEEFPLSP-----                | 233 |
| <i>KSR1-Capitella-teleta/1-536</i>                  |     |                                                             |                                 |     |
| <i>KSR1-Rhipicephalus-sanguineus/1-864</i>          | 245 | E-----                                                      | AHLENRLDLGP-----                | 258 |
| <i>KSR1-Limulus-polyphemus/1-603</i>                |     |                                                             |                                 |     |
| <i>KSR3-Ramazzottius-variornatus-partial/1-451</i>  |     |                                                             |                                 |     |
| <i>KSR2-Homo-sapiens/1-950</i>                      | 315 | E-----                                                      | FQLCHR VDEAHTPKAKKKSKPL-----    | 337 |
| <i>KSR2-Danio-erio/1-966</i>                        | 322 | E-----                                                      | FQLGNRIDDAQTPKAKKKNKPL-----     | 344 |
| <i>KSR1-Homo-sapiens/1-923</i>                      | 313 | E-----                                                      | SQ L GNR I DDV S SMR-----       | 327 |
| <i>KSR1-Danio-erio/1-898</i>                        | 234 | E-----                                                      | SQ L GHR I EDTPTNKCVKKNKLF----- | 256 |
| <i>KSR3-Clytia-hemispherica/1-517</i>               |     |                                                             |                                 |     |
| <i>KSR3-Schmidtea-mediterranea/1-666</i>            | 1   | -----                                                       | MVDLNQ-----                     | 11  |
| <i>KSR3-Rhipicephalus-sanguineus/1-675</i>          |     |                                                             |                                 |     |
| <i>KSR3-Limulus-polyphemus/1-686</i>                |     |                                                             |                                 |     |
| <i>KSR3-Limulus-polyphemus-isoformB/1-671</i>       |     |                                                             |                                 |     |
| <i>KSR3-Lingula-anatina/1-626</i>                   | 1   | -----                                                       | MDENR-----                      | 5   |
| <i>KSR3-Crassostrea-gigas/1-585</i>                 |     |                                                             |                                 |     |
| <i>KSR3-Nematostella-vectensis/1-640</i>            |     |                                                             |                                 |     |
| <i>KSR3-Acropora-millepora/1-634</i>                |     |                                                             |                                 |     |
| <i>KSR3-Priapulus-caudatus/1-533</i>                |     |                                                             |                                 |     |
| <i>KSR3-Saccoglossus-kowaleskii/1-591</i>           | 12  | T-----                                                      | L-----                          | 18  |
| <i>KSR3-Ptychodera-flava/1-629</i>                  | 24  | L-----                                                      | AKLAQICQIAE-----                | 35  |
| <i>KSR3-Trichoplax-adherens/1-510</i>               |     |                                                             |                                 |     |
| <i>KSR3-Capitella-teleta/1-642</i>                  |     |                                                             |                                 |     |
| <i>KSR3-Eucidaris-tribuloides/1-545</i>             | 6   | -----                                                       | HLALIMEQLQ-----                 | 15  |
| <i>KSR3-Strongylocentrotus-purpuratus/1-602</i>     | 6   | -----                                                       | HIALIMEQLQ-----                 | 15  |
| <i>KSR3-Paracentrotus-lividus-RNAseq/1-600</i>      | 6   | -----                                                       | HIALIMEQLH-----                 | 15  |
| <i>KSR3-Notospermus-geniculatus/1-691</i>           | 3   | T-----                                                      | ARMTAADD SVR-----               | 19  |
| <i>KSR3-Aplysia-californica/1-405</i>               |     |                                                             |                                 |     |
| <i>KSR3-Amphiura-filliformis-partial/1-642</i>      |     |                                                             |                                 |     |
| <i>KSR3-Platynereis-dumerilii/1-704</i>             | 1   | -----                                                       | MDV LQ-----                     | 5   |
| <i>KSR3-Patiria-miniata/1-779</i>                   | 45  | T-----                                                      | ADIATIMDILT-----                | 56  |
| <i>KSR3-Anneissia-japonica/1-590</i>                | 1   | -----                                                       | MEVFT-----                      | 5   |
| <i>KSR3-Parastichopus-parvimensis-partial/1-330</i> |     |                                                             |                                 |     |





BRAF-Capitella-teleta/1-419 206 LV P E --- NCVVYKMN--- S P H K V P W D T D C G --- L -- L A G L Q L S V E L 240  
 BRAF-Priapulus-caudatus/1-368 175 L T P E --- M C R V C V R G --- T R A W V S W D V D L T --- E - L E S L E I E I E L 209  
 CRAF-Homo-sapiens/1-648 91 L Q P E --- C C A V F R L L H E H K G K K A R L D W N T D A A --- S - L I G E E L Q V D F 130  
 ARAF-Homo-sapiens/1-606 54 L N Q D --- C C V V Y R L I K --- G R K T V T A W D T A I A --- P - L D G E E L I V E V 90  
 RAF-Caenorhabditis-elegans/1-813 120 I T P Q --- L C H V N A S S --- D P K Q E S I E L S L T M E E I --- A S R L P G N E L W V H S 160  
 Raf-Rhipicephalus-sanguineus/1-803 173 L T T E --- M C V V F K C S --- T R A V V D W N E D V S --- H - I E D D D I Q V E I 207  
 BRAF-Limulus-caudatus/1-781 175 L T P H --- M C V V Y R C N --- P R V R I E W D T D I T --- S - L E G E E I T V E I 209  
 RAF-Ramazzottius-variornatus/1-885 261 L V P S --- K C R V F K F D L K D T N K R I A V K W T D D V A --- S - I E G D R I V V E E 300  
 RAF-Schmidtea-mediterranea/1-737 159 L D P K --- K L K A Y L K G --- K S I P W N T D A M --- R V A A T G E T I S V R Y 193  
 RAF-Amphimedon-queenslandica/1-904 183 L T P N --- T C I V Y A E S --- P R L L I E W D T D T T --- Q - L S G K E V F V E Y 217  
 RAF-Clytia-hemispherica/1-792 210 L T T D --- S Y R V Y N K A --- N R E L I A W D S D V S --- L - L D G A E V I V E M 244  
 BRAF-Crassostrea-gigas/1-688 137 L S P E --- N C N V Y D S T --- T K M P I S W D I D M A --- N - L A G K D I N V C E 171  
 RAF-Nematostella-vectensis/1-730 165 I A I E --- T C L I F H C G --- T R D I I S W D T H L F --- E - L E G E E I S V E M 199  
 RAF-Acropora-millepora/1-729 161 L T P E --- A C L I C D C Y --- S R N I V G W D T D L S --- S F - V E D V E L S V E R 196  
 BRAF-Homo-sapiens/1-766 190 L I P E --- C C A V Y R I Q --- D G E K K P I G W D T D I S --- W - L T G E E L H V E V 226  
 BRAF-Danio-erio/1-777 200 L I P E --- C C A V Y R V Q --- D G E K K P I G W D T D I S --- W - L T G E E L H V E V 236  
 BRAF-Eucidaris-tribuloides-partial/1-725 162 L T P E --- M C V V Y K R E --- P R V L V S W D T D M M --- Y - L A G E E I S V E L 196  
 BRAF-Strongylocentrotus-purpuratus/1-803 151 L T P E --- M C I V Y R V N --- P R M A L S W D T D M M --- Y - L A G E E I S V E L 185  
 BRAF-Paracentrotus-lividus-RNAseq/1-746 182 L T P E --- M C I V Y R T N --- P R M A L S W E T D M M --- Y - L A G E E I S V E L 216  
 BRAF-Paracentrotus-lividus-contigEST/1-716 152 L T P E --- M C I V Y R T N --- P R M A L S W E T D M M --- Y - L A G E E I S V E L 186  
 BRAF-Saccoglossus-kowaleskii/1-733 117 Y S S E --- T C L V F R K D --- T G C P V D W D T D M S --- W - L E G E E L L V Q V 151  
 RAF-Parastichopus-parvimensis/1-747 137 L T P E --- M C V V Y K F N --- D D K K T Q I S W D T D M M --- Y - L S G E E I T V E L 173  
 BRAF-Branchiostoma-floridae/1-831 169 V S A E --- T C R V F R I S --- P R V M V E W D T D M S --- W - L E G E E I S V E I 203  
 BRAF-Trichoplax-adherens-partial/1-325  
 BRAF-Patiria-miniata-partial/1-819 241 L T V E --- M C N V Y K R Q --- P R H P V A W D T D M M --- Y - L A G E E --- 270  
 KSR1-Caenorhabditis-elegans/1-771 170 I --- V T P S P K F --- N V P S L S --- V T S --- A - K M I --- 190  
 KSR2-Caenorhabditis-elegans/1-550 49 S --- V T S S N P I --- N A P P P T --- A T S --- S S S V L --- 70  
 KSR1-Amphimedon-queenslandica/1-1246 485 L P L --- I Q C S V E Q S E F --- P S S S V K --- S H S V P R --- L A N L --- 513  
 KSR1-Patiria-miniata/1-787 348 --- --- M S P H --- --- K G M F N --- 356  
 KSR1-Anneissia-japonica/1-885 305 --- G Q --- T S P R K --- S S --- P --- 314  
 KSR1-Parastichopus-parvimensis/1-879 333 R R N S H --- S S P F R --- T D P N R L --- D --- S P M V L --- 354  
 KSR1-Eucidaris-tribuloides/1-873 305 --- R A N --- H S P S R --- K I - S P G --- S --- V G M L P --- 323  
 KSR1-Strongylocentrotus-purpuratus/1-869 305 --- L S S --- P C R --- S E E R L T --- D --- I G V --- 320  
 KSR1-Paracentrotus-lividus/1-848 299 --- L P S --- P S R --- S E E R L T --- D --- I G L --- 314  
 KSR1-Trichoplax-adherens/1-966 328 M R T T D K N I Q C R L P L Q A A --- M L S G S C --- E A L --- L H D S Q N C T N D I 364  
 KSR1-Schmidtea-mediterranea/1-954 375 L K V N D G --- N C L T N Q Q --- F Q P S V F Q F N Q D N L A V I N Y G M I E K E R R S S Y E E K L M --- 421  
 KSR1-Priapulus-caudatus-partial/1-248 40 G Q S G H S --- S P S V S S P A R --- S P P G G --- 59  
 KSR1-Clytia-hemispherica/1-881 263 I I T I --- --- P P S T --- D G E T D S D H S 279  
 KSR1-Nematostella-vectensis-partial/1-917 295 L T I --- --- --- E I P K --- A E S G D Q L S V L S 312  
 KSR1-Acropora-millepora/1-957 354 M T I --- --- --- Q I P K --- S V S G D I C --- 367  
 KSR1-Drosophila-melanogaster/1-966 312 --- E Q --- L A R N R L P T D --- P S P D S H --- S S T --- S S D I F V D P 339  
 KSR1-Crassostrea-gigas/1-859 316 L T L E N T --- H V V R R P S N --- E D P Y P S --- P S Q --- T S P S C L --- 344  
 KSR1-Saccoglossus-kowalevskii/1-898 309 A S S G Q S --- S P R K N S P A R --- T P P T P H --- --- H F I H D --- 334  
 KSR1-Branchiostoma-floridae/1-865 260 L R V I Q --- K K M K T P G T --- P P P S K S --- N L Q L P E Y Q L N P L T R S R S H E A Q L T H R 303  
 KSR1-Capitella-teleta/1-536  
 KSR1-Rhipicephalus-sanguineus/1-864 285 L E L A N --- C S P L S P S R --- S P P F V S --- P D Q Q --- G D A C F V --- 313  
 BRAF-Limulus-polyphemus/1-603  
 KSR3-Ramazzottius-variornatus-partial/1-451  
 KSR2-Homo-sapiens/1-950 368 F F V G H --- A --- P F L P S --- T --- P P V H T 384  
 KSR2-Danio-erio/1-966 375 F F F P --- --- N F V P S --- T --- P P V H S 389  
 KSR1-Homo-sapiens/1-923  
 KSR1-Danio-erio/1-898 284 A P A T A --- P --- Y T L P G --- T --- P T L Q E 300  
 KSR3-Clytia-hemispherica/1-517  
 KSR3-Schmidtea-mediterranea/1-666  
 KSR3-Rhipicephalus-sanguineus/1-675  
 KSR3-Limulus-polyphemus/1-686  
 KSR3-Limulus-polyphemus-isoformB/1-671  
 KSR3-Lingula-anatina/1-626  
 KSR3-Crassostrea-gigas/1-585  
 KSR3-Nematostella-vectensis/1-640  
 KSR3-Acropora-millepora/1-634  
 KSR3-Priapulus-caudatus/1-533  
 KSR3-Saccoglossus-kowaleskii/1-591  
 KSR3-Ptychodera-flava/1-629  
 KSR3-Trichoplax-adherens/1-510  
 KSR3-Capitella-teleta/1-642  
 KSR3-Eucidaris-tribuloides/1-545  
 KSR3-Strongylocentrotus-purpuratus/1-602  
 KSR3-Paracentrotus-lividus-RNAseq/1-600  
 KSR3-Notospermus-geniculatus/1-691  
 KSR3-Aplysia-californica/1-405  
 KSR3-Amphiura-filliformis-partial/1-642  
 KSR3-Platynereis-dumerilii/1-704  
 KSR3-Patiria-miniata/1-779  
 KSR3-Anneissia-japonica/1-590  
 KSR3-Parastichopus-parvimensis-partial/1-330











BRAF-Capitella-teleta/1-419  
 BRAF-Priapulus-caudatus/1-368  
 CRAF-Homo-sapiens/1-648  
 ARAF-Homo-sapiens/1-606  
 RAF-Caenorhabditis-elegans/1-813  
 Raf-Rhipicephalus-sanguineus/1-803  
 BRAF-Limulus-caudatus/1-781  
 RAF-Ramazzottius-variornatus/1-885  
 RAF-Schmidtea-mediterranea/1-737  
 RAF-Amphimedon-queenslandica/1-904  
 RAF-Clytia-hemispherica/1-792  
 BRAF-Crassostrea-gigas/1-688  
 RAF-Nematostella-vectensis/1-730  
 RAF-Acropora-millepora/1-729  
 BRAF-Homo-sapiens/1-766  
 BRAF-Danio-erio/1-777  
 BRAF-Eucidaris-tribuloides-partial/1-725  
 BRAF-Strongylocentrotus-purpuratus/1-803  
 BRAF-Paracentrotus-lividus-RNAseq/1-746  
 BRAF-Paracentrotus-lividus-contigEST/1-716  
 BRAF-Saccoglossus-kowaleskii/1-733  
 RAF-Parastichopus-parvimensis/1-747  
 BRAF-Branchiostoma-floridae/1-831  
 BRAF-Trichoplax-adherens-partial/1-325  
 BRAF-Patiria-miniata-partial/1-819  
 KSR1-Caenorhabditis-elegans/1-771  
 KSR2-Caenorhabditis-elegans/1-550  
 KSR1-Amphimedon-queenslandica/1-1246  
 KSR1-Patiria-miniata/1-787  
 KSR1-Anneissia-japonica/1-885  
 KSR1-Parastichopus-parvimensis/1-879  
 KSR1-Eucidaris-tribuloides/1-873  
 KSR1-Strongylocentrotus-purpuratus/1-869  
 KSR1-Paracentrotus-lividus/1-848  
 KSR1-Trichoplax-adherens/1-966  
 KSR1-Schmidtea-mediterranea/1-954  
 KSR1-Priapulus-caudatus-partial/1-248  
 KSR1-Clytia-hemispherica/1-881  
 KSR1-Nematostella-vectensis-partial/1-917  
 KSR1-Acropora-millepora/1-957  
 KSR1-Drosophila-melanogaster/1-966  
 KSR1-Crassostrea-gigas/1-859  
 KSR1-Saccoglossus-kowaleskii/1-898  
 KSR1-Branchiostoma-floridae/1-865  
 KSR1-Capitella-teleta/1-536  
 KSR1-Rhipicephalus-sanguineus/1-864  
 KSR1-Limulus-polyphemus/1-603  
 KSR3-Ramazzottius-variornatus-partial/1-451  
 KSR2-Homo-sapiens/1-950  
 KSR2-Danio-erio/1-966  
 KSR1-Homo-sapiens/1-923  
 KSR1-Danio-erio/1-898  
 KSR3-Clytia-hemispherica/1-517  
 KSR3-Schmidtea-mediterranea/1-666  
 KSR3-Rhipicephalus-sanguineus/1-675  
 KSR3-Limulus-polyphemus/1-686  
 KSR3-Limulus-polyphemus-isoformB/1-671  
 KSR3-Lingula-anatina/1-626  
 KSR3-Crassostrea-gigas/1-585  
 KSR3-Nematostella-vectensis/1-640  
 KSR3-Acropora-millepora/1-634  
 KSR3-Priapulus-caudatus/1-533  
 KSR3-Saccoglossus-kowaleskii/1-591  
 KSR3-Ptychodera-flava/1-629  
 KSR3-Trichoplax-adherens/1-510  
 KSR3-Capitella-teleta/1-642  
 KSR3-Eucidaris-tribuloides/1-545  
 KSR3-Strongylocentrotus-purpuratus/1-602  
 KSR3-Paracentrotus-lividus-RNAseq/1-600  
 KSR3-Notospermus-geniculatus/1-691  
 KSR3-Aplysia-californica/1-405  
 KSR3-Amphiura-filiformis-partial/1-642  
 KSR3-Platynereis-dumerilli/1-704  
 KSR3-Patiria-miniata/1-779  
 KSR3-Anneissia-japonica/1-590  
 KSR3-Parastichopus-parvimensis-partial/1-330

319 AENVSAAG-----LLSPPTSHPR-----G 337  
 281 AHNDKALGMGA-----LASPSNVARSPSPSPVRRSAP 312  
 197 PNSTIGDSG-----VPALEPSL-TMRRMRRESVSRMPV 226  
 157 SVQDLSGGS-----RQHEAP--SNRPLNELLPQGP 185  
 235 GIA SQVE-GPDRSVAEIVLAN-LAPTS---GQSPAATPD-SSHPDLTSLIKRTGG 282  
 279 AMPDMVGG-PQYE-SCV-----YPPFMP--PGG-GGEPVLSPT 312  
 280 AMNNTASNMLQTT-GDS-----YSPYASN-----YQY-QRQP--AVT 312  
 371 AKMFL-AN-DAN-GEA-----FLPYGL----- 389  
 256 -----NYGGESSAGYSNKP-----NTS 272  
 288 SQHP--KPD--D-----SPQ-----PSSP-----VPH 306  
 316 AKQNP-----N----- 321  
 245 KPKL----- 248  
 271 AGRNEF----- 276  
 263 CLG-----PD-----TLFVEE-----L 274  
 291 VSKFF-EHHP-IPQ-EEASLAET-----ALTS-GSSPSAPASDSIGPQILTS--PSP 336  
 301 ASKFL-VHHP-ITQ-EEVSEGT-----TPISEMCP-SLPPSESTGSLCHPT--VSP 346  
 267 ALRRDDE-----GPPYDP-----FPEP-D--SP 286  
 257 ALRKEEDY-----NDYPDT-----FP--D--EP 275  
 288 ALRKEEDY-----DYDP-----FP--D--EP 305  
 258 ALRKEEDY-----DYDP-----FP--D--EP 275  
 219 CLKGTGAEMPSDS-RSVFLDSDTEQ-----NDPGY--GKGMTLP--G 256  
 244 GMA-----EGKD---D-SRKNAGPYGEMDEAEEN---ESPVTTP--S 282  
 274 PIQSLLAQNSN---DVFIQPTTSSQPGGS-MQGGSLRTPSTGQSYLSTQPI--PT 321  
 ----- 322  
 322 ----LLMKNVD---E-D-----EDPYG-----EEPES----- 340  
 297 SV----- 298  
 173 TA----- 174  
 610 MMSPSH-----ESVYQVNKTGHLTSSGEY---G---S 635  
 425 -----P-----L---L---I 428  
 428 THQGYA-----SPSP-----I---F---H 440  
 444 ENPVPN----- 449  
 427 EAVNID-----NS-----L---G---R 437  
 418 NSGRTA-----SP-----I---M---S 428  
 413 EQARTE-----KP----- 420  
 463 LHDNLN-----LSQD-----T---S---K 475  
 516 -----KSP-----A---D---R 522  
 150 FFSGG-----EENPSVP-----A---A---A 165  
 369 DNE SRA-----QVDD-----R---K---K 381  
 404 RRYEY-----RSLP-----I---I---K 416  
 461 RRAWEY-----RSLP-----S---T---R 473  
 432 EQ-CGY-----ASLP-----H---V---H 443  
 413 KHRDGS-----PSP-----A---E---R 425  
 430 TN-PAM-----RQAA-----A---E---A 441  
 392 QG-TAQ-----WQN-----G---S--- 403  
 51 R S-GNE-----SPN-----I---L---R 61  
 395 QK-GGM-----QSPN-----H---A---A 406  
 132 KN-EGN-----YSP-----L---N---Q 143  
 ----- 471  
 471 RTES-----VPCDINN--P-----LRK 485  
 490 RTES-----VPCDINN--P-----L 502  
 403 RTES-----VPSDINN--P-----VDR 417  
 384 RTES-----VPSDINN--P-----VDR 398  
 ----- 91  
 91 LMND-K-----PPLSFLDPSSKNP-----L---SSTS-S 114  
 124 VCHE-V-----LTVSP-LMDQ-PFLFSSGDH-----G---T-LASA 152  
 85 EKSA-F-----SPTATENN-----L---P-RSSF 104  
 81 EKT-D-V-----ISLDTTESN-----E---P-RMSA 100  
 92 QANE-I-----NSNMDLSVLQSL-----NN---L----- 111  
 57 TTNE-T-----PVI-FHSRPHRPL-----I-RRS-----LKR 80  
 72 FGKD-V-----KRP-S-DTGRGLA-----QMR 91  
 75 NARE-K-----SIHQANVEHLV-----RKR 95  
 67 QTHE-V-----NRNKLPSI-----Y 80  
 89 -----QRLR-PCRALLVEDKQFV-----A---EDR 109  
 106 ---R-A-----SQR-LRQWP-SVERRRKNS-----A---KA 128  
 ----- 73  
 73 QTT-P-D-----DQDLC-SAKHALQ--HQES---Y---CK 96  
 86 -----QTAQRNLDIQT--SHDA---S---GK 104  
 86 -----NVVPTCHAALAEASRRH--Q---S-AN 106  
 86 -----NSVP-SCHTALE-ASRRQ--Q---SVN 105  
 123 QANE-V-----NSNV-----VVV-PDDGRH-----Y---CHH 144  
 ----- 90  
 90 -----TQRSQ-GEFLT-PQHRRH-----H---HQRSGP 112  
 97 QANE-V-----NSNL-----LLVP-CHGR-----G---HSYSEK 121  
 141 LAHQ-A-----EPSYEP-MSTSTP-QHRE-----G---LSR 167  
 90 -----E-Q-----PQTFCTCVQKPRPILHRQ-----H---SVT 113  
 -----



|                                              |     |        |         |    |      |      |             |               |     |
|----------------------------------------------|-----|--------|---------|----|------|------|-------------|---------------|-----|
| BRAF-Capitella-teleta/1-419                  | 338 | GG     | -----SH | PQ | ---A | IPRR | -----ARSSAQ | IPQRE         | 359 |
| BRAF-Priapulul-caudatus/1-368                | 313 |        | -----   |    |      |      | -----       | PRSSQTAPLAHRE | 328 |
| CRAF-Homo-sapiens/1-648                      | 227 | SS     | -----   |    |      |      | -----       | QHRY--STPHAF  | 255 |
| ARAF-Homo-sapiens/1-606                      | 186 | SP     | -----   |    |      |      | -----       | RTQH--CDPEHF  | 210 |
| RAF-Caenorhabditis-elegans/1-813             | 283 | VK     | -----   |    |      |      | -----       | RHPM--AVSPQ   | 308 |
| Raf-Rhipicephalus-sanguineus/1-803           | 313 |        | -----   |    |      |      | -----       | SAPLS--VPR    | 330 |
| BRAF-Limulus-caudatus/1-781                  | 313 |        | -----   |    |      |      | -----       | SPKN--VPR     | 330 |
| RAF-Ramazzottius-variornatus/1-885           | 390 |        | -----   |    |      |      | -----       | PSV           | 402 |
| RAF-Schmidtea-mediterranea/1-737             | 273 |        | -----   |    |      |      | -----       | PLS           | 285 |
| RAF-Amphimedon-queenslandica/1-904           | 307 | SP     | -----   |    |      |      | -----       | TVPL--LVPTK   | 335 |
| RAF-Clytia-hemispherica/1-792                | 322 |        | -----   |    |      |      | -----       | SNT--NIP      | 337 |
| BRAF-Crassostrea-gigas/1-688                 | 249 |        | -----   |    |      |      | -----       | ADA--GFS      | 264 |
| RAF-Nematostella-vectensis/1-730             | 277 |        | -----   |    |      |      | -----       | D--DAETT      | 290 |
| RAF-Acropora-millepora/1-729                 | 275 |        | -----   |    |      |      | -----       | VA--NVS       | 289 |
| BRAF-Homo-sapiens/1-766                      | 337 | SK     | -----   |    |      |      | -----       | SIP           | 361 |
| BRAF-Danio-erio/1-777                        | 347 | SK     | -----   |    |      |      | -----       | SIP           | 371 |
| BRAF-Eucidaris-tribuloides-partial/1-725     | 287 | SS     | -----   |    |      |      | -----       | DD--DDQDF     | 304 |
| BRAF-Strongylocentrotus-purpuratus/1-803     | 276 | ES     | -----   |    |      |      | -----       | SS--DDQDF     | 293 |
| BRAF-Paracentrotus-lividus-RNAseq/1-746      | 306 | ES     | -----   |    |      |      | -----       | SS--DDQDF     | 323 |
| BRAF-Paracentrotus-lividus-contigEST/1-716   | 276 | ES     | -----   |    |      |      | -----       | SS--DDQDF     | 293 |
| BRAF-Saccoglossus-kowaleskii/1-733           | 257 |        | -----   |    |      |      | -----       | AT--SQPHI     | 272 |
| RAF-Parastichopus-parvimensis/1-747          | 283 | SS     | -----   |    |      |      | -----       | SHS--QPREI    | 300 |
| BRAF-Branchiostoma-floridae/1-831            | 322 | PS     | -----   |    |      |      | -----       | PAQ--LIP      | 339 |
| BRAF-Trichoplax-adherens-partial/1-325       |     |        | -----   |    |      |      | -----       |               |     |
| BRAF-Patiria-miniata-partial/1-819           | 341 | P      | -----   |    |      |      | -----       | STP--ITT      | 357 |
| KSR1-Caenorhabditis-elegans/1-771            |     |        | -----   |    |      |      | -----       |               |     |
| KSR2-Caenorhabditis-elegans/1-550            |     |        | -----   |    |      |      | -----       |               |     |
| KSR1-Amphimedon-queenslandica/1-1246         | 636 |        | -----   |    |      |      | -----       | CN--TP        | 649 |
| KSR1-Patiria-miniata/1-787                   | 429 |        | -----   |    |      |      | -----       | R--R          | 429 |
| KSR1-Anneissia-japonica/1-885                | 441 |        | -----   |    |      |      | -----       | R--R          | 441 |
| KSR1-Parastichopus-parvimensis/1-879         |     |        | -----   |    |      |      | -----       |               |     |
| KSR1-Eucidaris-tribuloides/1-873             | 438 |        | -----   |    |      |      | -----       | S--S          | 438 |
| KSR1-Strongylocentrotus-purpuratus/1-869     | 429 |        | -----   |    |      |      | -----       | H--H          | 429 |
| KSR1-Paracentrotus-lividus/1-848             |     |        | -----   |    |      |      | -----       |               |     |
| KSR1-Trichoplax-adherens/1-966               | 476 |        | -----   |    |      |      | -----       | IN--L         | 478 |
| KSR1-Schmidtea-mediterranea/1-954            |     |        | -----   |    |      |      | -----       |               |     |
| KSR1-Priapulul-caudatus-partial/1-248        | 166 |        | -----   |    |      |      | -----       | CS--LAVL      | 175 |
| KSR1-Clytia-hemispherica/1-881               | 382 |        | -----   |    |      |      | -----       | LS--LPP       | 393 |
| KSR1-Nematostella-vectensis-partial/1-917    |     |        | -----   |    |      |      | -----       |               |     |
| KSR1-Acropora-millepora/1-957                |     |        | -----   |    |      |      | -----       |               |     |
| KSR1-Drosophila-melanogaster/1-966           |     |        | -----   |    |      |      | -----       |               |     |
| KSR1-Crassostrea-gigas/1-859                 |     |        | -----   |    |      |      | -----       |               |     |
| KSR1-Saccoglossus-kowaleskii/1-898           |     |        | -----   |    |      |      | -----       |               |     |
| KSR1-Branchiostoma-floridae/1-865            |     |        | -----   |    |      |      | -----       |               |     |
| KSR1-Capitella-teleta/1-536                  |     |        | -----   |    |      |      | -----       |               |     |
| KSR1-Rhipicephalus-sanguineus/1-864          |     |        | -----   |    |      |      | -----       |               |     |
| KSR1-Limulus-polyphemus/1-603                |     |        | -----   |    |      |      | -----       |               |     |
| KSR3-Ramazzottius-variornatus-partial/1-451  |     |        | -----   |    |      |      | -----       |               |     |
| KSR2-Homo-sapiens/1-950                      | 486 |        | -----   |    |      |      | -----       | PPRYSD        | 491 |
| KSR2-Danio-erio/1-966                        | 503 |        | -----   |    |      |      | -----       | RYSD          | 506 |
| KSR1-Homo-sapiens/1-923                      | 418 |        | -----   |    |      |      | -----       | AA-EH         | 422 |
| KSR1-Danio-erio/1-898                        | 399 |        | -----   |    |      |      | -----       | PEAPQ         | 404 |
| KSR3-Clytia-hemispherica/1-517               |     |        | -----   |    |      |      | -----       |               |     |
| KSR3-Schmidtea-mediterranea/1-666            | 115 |        | -----   |    |      |      | -----       | ISN--SNKHL    | 140 |
| KSR3-Rhipicephalus-sanguineus/1-675          | 153 | SQ     | -----   |    |      |      | -----       | MSNT          | 161 |
| KSR3-Limulus-polyphemus/1-686                | 105 | SD     | -----   |    |      |      | -----       | IYNI          | 114 |
| KSR3-Limulus-polyphemus-isoformB/1-671       | 101 | NY     | -----   |    |      |      | -----       | CKK           | 110 |
| KSR3-Lingula-anatina/1-626                   | 112 |        | -----   |    |      |      | -----       | CKK           | 122 |
| KSR3-Crassostrea-gigas/1-585                 | 81  |        | -----   |    |      |      | -----       | L--L          | 83  |
| KSR3-Nematostella-vectensis/1-640            | 92  | NQNI   | -----   |    |      |      | -----       | KI--KI        | 95  |
| KSR3-Acropora-millepora/1-634                | 96  | ERSL   | -----   |    |      |      | -----       |               | 99  |
| KSR3-Priapulul-caudatus/1-533                | 81  |        | -----   |    |      |      | -----       |               | 83  |
| KSR3-Saccoglossus-kowaleskii/1-591           | 110 |        | -----   |    |      |      | -----       | T--T          | 116 |
| KSR3-Ptychodera-flava/1-629                  | 129 |        | -----   |    |      |      | -----       | S--S          | 135 |
| KSR3-Trichoplax-adherens/1-510               |     |        | -----   |    |      |      | -----       |               |     |
| KSR3-Capitella-teleta/1-642                  | 97  |        | -----   |    |      |      | -----       |               | 107 |
| KSR3-Eucidaris-tribuloides/1-545             |     |        | -----   |    |      |      | -----       |               |     |
| KSR3-Strongylocentrotus-purpuratus/1-602     |     |        | -----   |    |      |      | -----       |               |     |
| KSR3-Paracentrotus-lividus-RNAseq/1-600      |     |        | -----   |    |      |      | -----       |               |     |
| KSR3-Notospermus-geniculatus/1-691           | 145 |        | -----   |    |      |      | -----       | P             | 153 |
| KSR3-Aplysia-californica/1-405               |     |        | -----   |    |      |      | -----       |               |     |
| KSR3-Amphiura-filiformis-partial/1-642       | 113 | SSLRL  | -----   |    |      |      | -----       | PRDS          | 167 |
| KSR3-Platynereis-dumerillii/1-704            | 122 | SRDLSS | -----   |    |      |      | -----       | SR            | 164 |
| KSR3-Patiria-miniata/1-779                   | 168 |        | -----   |    |      |      | -----       | FQQ           | 212 |
| KSR3-Anneissia-japonica/1-590                | 114 |        | -----   |    |      |      | -----       | IQD--IQD      | 116 |
| KSR3-Parastichopus-parvimensis-partial/1-330 |     |        | -----   |    |      |      | -----       |               |     |

BRAF-Capitella-teleta/1-419  
 BRAF-Priapul-us-caudatus/1-368  
 CRAF-Homo-sapiens/1-648  
 ARAF-Homo-sapiens/1-606  
 RAF-Caenorhabditis-elegans/1-813  
 Raf-Rhipicephalus-sanguineus/1-803  
 BRAF-Limulus-caudatus/1-781  
 RAF-Ramazzottius-variornatus/1-885  
 RAF-Schmidtea-mediterranea/1-737  
 RAF-Amphimedon-queenslandica/1-904  
 RAF-Clytia-hemispherica/1-792  
 BRAF-Crassostrea-gigas/1-688  
 RAF-Nematostella-vectensis/1-730  
 RAF-Acropora-millepora/1-729  
 BRAF-Homo-sapiens/1-766  
 BRAF-Danio-erio/1-777  
 BRAF-Eucidaris-tribuloides-partial/1-725  
 BRAF-Strongylocentrotus-purpuratus/1-803  
 BRAF-Paracentrotus-lividus-RNAseq/1-746  
 BRAF-Paracentrotus-lividus-contigEST/1-716  
 BRAF-Saccoglossus-kowaleskii/1-733  
 RAF-Parastichopus-parvimensis/1-747  
 BRAF-Branchiostoma-floridae/1-831  
 BRAF-Trichoplax-adherens-partial/1-325  
 BRAF-Patiria-miniata-partial/1-819  
 KSR1-Caenorhabditis-elegans/1-771  
 KSR2-Caenorhabditis-elegans/1-550  
 KSR1-Amphimedon-queenslandica/1-1246  
 KSR1-Patiria-miniata/1-787  
 KSR1-Anneissia-japonica/1-885  
 KSR1-Parastichopus-parvimensis/1-879  
 KSR1-Eucidaris-tribuloides/1-873  
 KSR1-Strongylocentrotus-purpuratus/1-869  
 KSR1-Paracentrotus-lividus/1-848  
 KSR1-Trichoplax-adherens/1-966  
 KSR1-Schmidtea-mediterranea/1-954  
 KSR1-Priapul-us-caudatus-partial/1-248  
 KSR1-Clytia-hemispherica/1-881  
 KSR1-Nematostella-vectensis-partial/1-917  
 KSR1-Acropora-millepora/1-957  
 KSR1-Drosophila-melanogaster/1-966  
 KSR1-Crassostrea-gigas/1-859  
 KSR1-Saccoglossus-kowaleskii/1-898  
 KSR1-Branchiostoma-floridae/1-865  
 KSR1-Capitella-teleta/1-536  
 KSR1-Rhipicephalus-sanguineus/1-864  
 KSR1-Limulus-polyphemus/1-603  
 KSR3-Ramazzottius-variornatus-partial/1-451  
 KSR2-Homo-sapiens/1-950  
 KSR2-Danio-erio/1-966  
 KSR1-Homo-sapiens/1-923  
 KSR1-Danio-erio/1-898  
 KSR3-Clytia-hemispherica/1-517  
 KSR3-Schmidtea-mediterranea/1-666  
 KSR3-Rhipicephalus-sanguineus/1-675  
 KSR3-Limulus-polyphemus/1-686  
 KSR3-Limulus-polyphemus-isoformB/1-671  
 KSR3-Lingula-anatina/1-626  
 KSR3-Crassostrea-gigas/1-585  
 KSR3-Nematostella-vectensis/1-640  
 KSR3-Acropora-millepora/1-634  
 KSR3-Priapul-us-caudatus/1-533  
 KSR3-Saccoglossus-kowaleskii/1-591  
 KSR3-Ptychodera-flava/1-629  
 KSR3-Trichoplax-adherens/1-510  
 KSR3-Capitella-teleta/1-642  
 KSR3-Eucidaris-tribuloides/1-545  
 KSR3-Strongylocentrotus-purpuratus/1-602  
 KSR3-Paracentrotus-lividus-RNAseq/1-600  
 KSR3-Notospermus-geniculatus/1-691  
 KSR3-Aplysia-californica/1-405  
 KSR3-Amphiura-filiformis-partial/1-642  
 KSR3-Platynereis-dumerilii/1-704  
 KSR3-Patiria-miniata/1-779  
 KSR3-Anneissia-japonica/1-590  
 KSR3-Parastichopus-parvimensis-partial/1-330

360 R S T S A P P ----- NV S M N L V N A G D I P S L E - E ----- 382  
 329 R S T S A P P ----- N V C I N L V Q P Q V S L E L D D Q ----- 352  
 256 R S T S T P P ----- N V H M V S T T L P V D S R M I E D ----- 279  
 211 R S T S T P P ----- N V H M V S T T A P M D S N L I Q L ----- 234  
 309 R S S S A P P ----- N I N A I N D E A T V Q H N Q R I L ----- 332  
 331 R S T S A P P ----- N V C Y N L V S G S D F S A E D F A ----- 354  
 331 R S T S A P P ----- N V C Y N T V N - H D M T L E E F A ----- 353  
 403 R S T S A P P ----- D V N T V V T V C E P L P A V - Q S ----- 425  
 286 R S S S T P P ----- N V S N N I I T Q G L N H N N P N S ----- 309  
 336 R S I S T P P ----- N V L Y N S P A N Y D P Y P T ----- 356  
 338 R S I S A P P ----- N V N M I G Q P D S G L I E A V L E ----- 361  
 265 R S Q S A P P ----- N V N I N I T D T H P D H L E ----- 285  
 291 R S I S A P P ----- N V C I N A V G T D N F L E E L ----- 312  
 290 R S I S A P P ----- D V Y R S R I N G C T A A L ----- 310  
 362 R S S S A P P ----- N V H I N T I E P V N I D D L I R D ----- 385  
 372 R S S S A P P ----- N V H I N T I E P V N I D D L I R D ----- 395  
 305 R S T S A P P ----- N I C Q N A V N V P V H Q S K - D G ----- 327  
 294 R S T S A P P ----- N I C Q N A V N V P G Q Q F D - S E ----- 316  
 324 R S T S A P P ----- N I C Q N A V N V P G Q Q F D - S E ----- 346  
 294 R S T S A P P ----- N I C Q N A V N V P G Q Q F D - S E ----- 316  
 273 R S T S A P P ----- S I N L V T G D H D S K T L E - E L ----- 295  
 301 R S T S A P P ----- N V S F N A V N V N L T K D N - L D ----- 323  
 340 R S I S A P P ----- N V C I N M V G N D A L S Q L - E E ----- 362  
 -----  
 358 R S T S A P P ----- N V S F N A V N A I S N E A F - S D ----- 380  
 299 ----- P G S R - S M ----- N ----- 305  
 175 ----- S I S K - S L ----- T ----- 181  
 650 ----- T F F I H - D L N R E P S K N ----- Q F S - P V T S T K R P ----- 674  
 430 ----- R - T A V S E A ----- S L P Q S ----- 441  
 442 ----- R - P A P I E ----- P P ----- 449  
 -----  
 439 ----- H - E ----- 440  
 430 ----- K - P A R T D ----- P P ----- 437  
 -----  
 479 ----- K - K L N A S P S R M ----- T S ----- 490  
 523 ----- K N S E N ----- S I A N ----- 531  
 176 ----- G H V R - Q G R H Q G H R P ----- T V S V S V S A F ----- 197  
 394 ----- S L V P I K - R T N S E P S ----- N F A N R V R S I ----- 415  
 417 ----- S Q V K - R T N S E P - F ----- N I A H N V G E M I R E ----- 439  
 474 ----- S G F K - R T N S E P - S ----- S I A L Q V E G L K Q ----- 495  
 444 ----- G A A K - G S P L V ----- 452  
 426 ----- N ----- 426  
 442 ----- T A Q S - G - H G I N N ----- N P S V K V ----- 457  
 404 ----- P I I T - S G R Y A K V A A ----- N T A L T V Y S T D ----- 426  
 62 ----- H N I N - H T ----- V S L P V G A ----- 74  
 407 ----- A H L G - S S P L H - G C ----- S S L R S E G ----- 424  
 144 ----- A H F P - G A P N F - I K ----- S D S G R K K K ----- 162  
 -----  
 492 ----- L H I S Q T L P K T N ----- K I N ----- 505  
 507 ----- L H I S Q T L P K T N ----- K I N ----- 520  
 423 ----- F G ----- T L P K A ----- L T K ----- 432  
 405 ----- F G ----- T L P K A ----- I T K ----- 414  
 -----  
 141 ----- K F P N G N I P H R R D ----- S G I F N I ----- 158  
 162 ----- A A P ----- P ----- P P R S P T ----- 171  
 115 ----- A S L ----- S ----- G K N N S S ----- 124  
 111 ----- S P S ----- S ----- G N T N G S ----- 120  
 123 ----- T S A ----- 125  
 84 - Q - I P F R K T R L ----- K Q E - - S K E V ----- 99  
 96 ----- L P R K Y T D A ----- K G R I R ----- 108  
 100 ----- L P ----- L N A ----- R G K I R ----- 109  
 84 V S V P A Q ----- V A ----- R P A T C S ----- 97  
 117 ----- M P R ----- S P - R Q A F I S M ----- 128  
 136 ----- M P T ----- S V - T D S A F G E ----- 147  
 1 ----- M T T T ----- I Q T T S - R D I I L S T - Q P E D ----- 20  
 108 ----- S S S T K S E K S ----- F N G K D S N I F S S ----- 127  
 105 - V V S S Q - A P K R K D S T D S ----- F H E ----- 122  
 107 - S T P V P - T H R R K S S T E S ----- F R E ----- 124  
 106 - S T P L P - L K R R K S T E S ----- F R E ----- 123  
 154 ----- S R E S K S S T ----- D S N I F S ----- 167  
 -----  
 168 - Q S P V E V H Q ----- T E Q Q Q P S T R ----- Y H L N P E - Q E D R ----- 194  
 165 - S S P S ----- T P R S K - E D P S K D ----- A N I F T K ----- 185  
 213 R Y S P L P P Y Q D H A K T A H S E T V P K T E D L T N Q N P D Y H G N Q M T S T P K R P I I K T Q L V Q E G T ----- 268  
 117 ----- A V I S P S ----- 122





|                                              |     |                                                                                                                                                                     |     |
|----------------------------------------------|-----|---------------------------------------------------------------------------------------------------------------------------------------------------------------------|-----|
| BRAF-Capitella-teleta/1-419                  | 405 | -----FV-----A-----                                                                                                                                                  | 407 |
| BRAF-Priapulus-caudatus/1-368                |     | -----                                                                                                                                                               |     |
| CRAF-Homo-sapiens/1-648                      | 289 | -----SP-----SA-----L-----                                                                                                                                           | 293 |
| ARAF-Homo-sapiens/1-606                      | 244 | -----AG-----SR-----GGSDGTP-----                                                                                                                                     | 254 |
| RAF-Caenorhabditis-elegans/1-813             | 348 | -----TGSLLST-----                                                                                                                                                   | 354 |
| Raf-Rhipicephalus-sanguineus/1-803           | 366 | -----SSPQ-----A                                                                                                                                                     | 370 |
| BRAF-Limulus-caudatus/1-781                  | 365 | -----SSPL-----T                                                                                                                                                     | 369 |
| RAF-Ramazzottius-variornatus/1-885           | 443 | -----ILTPA-----T                                                                                                                                                    | 448 |
| RAF-Schmidtea-mediterranea/1-737             | 319 | -----DI-----GKIPG-----HT-----N-----YLT-----                                                                                                                         | 332 |
| RAF-Amphimedon-queenslandica/1-904           | 373 | -----VSG-----SY-----VDNHL-----H-----S                                                                                                                               | 385 |
| RAF-Clytia-hemispherica/1-792                | 374 | -----TI-----S-----GG-----LT-----RQMS-----GP-----S                                                                                                                   | 388 |
| BRAF-Crassostrea-gigas/1-688                 |     | -----                                                                                                                                                               |     |
| RAF-Nematostella-vectensis/1-730             | 325 | -----TI-----SAVEG-----N-----                                                                                                                                        | 332 |
| RAF-Acropora-millepora/1-729                 | 319 | -----C-----KE-----DGSVSV-----                                                                                                                                       | 328 |
| BRAF-Homo-sapiens/1-766                      | 392 | -----GG-----ST-----TGLS-----                                                                                                                                        | 399 |
| BRAF-Danio-erio/1-777                        | 403 | -----GG-----ST-----TGLS-----                                                                                                                                        | 410 |
| BRAF-Eucidaris-tribuloides-partial/1-725     |     | -----                                                                                                                                                               |     |
| BRAF-Strongylocentrotus-purpuratus/1-803     | 341 | -----NI-----HGAHG-----GG-----HGKVLTPN-----S                                                                                                                         | 358 |
| BRAF-Paracentrotus-lividus-RNAseq/1-746      |     | -----                                                                                                                                                               |     |
| BRAF-Paracentrotus-lividus-contigEST/1-716   |     | -----                                                                                                                                                               |     |
| BRAF-Saccoglossus-kowaleskii/1-733           | 318 | -----LQNSP-----                                                                                                                                                     | 322 |
| RAF-Parastichopus-parvimensis/1-747          | 338 | -----LIGSP-----                                                                                                                                                     | 342 |
| BRAF-Branchiostoma-floridae/1-831            | 386 | -----VPP-----                                                                                                                                                       | 388 |
| BRAF-Trichoplax-adherens-partial/1-325       |     | -----                                                                                                                                                               |     |
| BRAF-Patiria-miniata-partial/1-819           | 398 | -----HAVSP-----                                                                                                                                                     | 402 |
| KSR1-Caenorhabditis-elegans/1-771            | 309 | -----F-----QFPD-----TA-----                                                                                                                                         | 315 |
| KSR2-Caenorhabditis-elegans/1-550            |     | -----                                                                                                                                                               |     |
| KSR1-Amphimedon-queenslandica/1-1246         | 698 | -----LEV-----P-----QL-----FLPG-----VR-----SHSNYRHP-----                                                                                                             | 717 |
| KSR1-Patiria-miniata/1-787                   | 444 | -----DHR-----Y-----PP-----QVPA-----FS-----H-----                                                                                                                    | 456 |
| KSR1-Anneissia-japonica/1-885                | 452 | -----SP-----EN-----QT-----SLQA-----FA-----H-----                                                                                                                    | 464 |
| KSR1-Parastichopus-parvimensis/1-879         | 451 | -----G-----P-----CSP-----FS-----P-----                                                                                                                              | 458 |
| KSR1-Eucidaris-tribuloides/1-873             | 442 | -----P-----P-----PAVP-----SS-----T-----                                                                                                                             | 449 |
| KSR1-Strongylocentrotus-purpuratus/1-869     | 439 | -----V-----V-----VNVA-----SS-----T-----                                                                                                                             | 446 |
| KSR1-Paracentrotus-lividus/1-848             | 421 | -----V-----V-----VTVA-----SS-----T-----                                                                                                                             | 428 |
| KSR1-Trichoplax-adherens/1-966               | 491 | -----A-----A-----PYNS-----YN-----SGYNSI-----                                                                                                                        | 503 |
| KSR1-Schmidtea-mediterranea/1-954            | 532 | -----ACAV-----FQ-----GS-----                                                                                                                                        | 539 |
| KSR1-Priapulus-caudatus-partial/1-248        | 205 | -----WSYK-----EE-----ERPD-----FT-----WLQKHL-----                                                                                                                    | 222 |
| KSR1-Clytia-hemispherica/1-881               | 434 | -----GASS-----SM-----VGA-----SH-----RGA-----SA-----                                                                                                                 | 450 |
| KSR1-Nematostella-vectensis-partial/1-917    | 460 | -----KNYP-----DM-----DF-----N-----YR-----QGQEVV-----                                                                                                                | 476 |
| KSR1-Acropora-millepora/1-957                | 512 | -----KCNS-----EI-----PV-----Q-----FS-----HKGSAT-----                                                                                                                | 528 |
| KSR1-Drosophila-melanogaster/1-966           | 453 | -----KKS-----TL-----GKPL-----HQ-----QH-----                                                                                                                         | 465 |
| KSR1-Crassostrea-gigas/1-859                 | 431 | -----K-----P-----SK-----NS-----SVPA-----FH-----TT-----                                                                                                              | 444 |
| KSR1-Saccoglossus-kowaleskii/1-898           | 458 | -----S-----L-----SP-----ND-----NG-----N-----YL-----YH-----                                                                                                          | 470 |
| KSR1-Branchiostoma-floridae/1-865            | 431 | -----LTQD-----QM-----QVPP-----FP-----HG-----                                                                                                                        | 444 |
| KSR1-Capitella-teleta/1-536                  | 77  | -----SMVH-----AA-----SVPA-----FA-----AQ-----                                                                                                                        | 90  |
| KSR1-Rhipicephalus-sanguineus/1-864          | 427 | -----GGR-----P-----AI-----CLPP-----FH-----GA-----                                                                                                                   | 440 |
| KSR1-Limulus-polyphemus/1-603                | 165 | -----R-----L-----HP-----SI-----NIP-----A-----FS-----GP-----                                                                                                         | 178 |
| KSR3-Ramazzottius-variornatus-partial/1-451  |     | -----                                                                                                                                                               |     |
| KSR2-Homo-sapiens/1-950                      |     | -----                                                                                                                                                               |     |
| KSR2-Danio-erio/1-966                        |     | -----                                                                                                                                                               |     |
| KSR1-Homo-sapiens/1-923                      |     | -----                                                                                                                                                               |     |
| KSR1-Danio-erio/1-898                        |     | -----                                                                                                                                                               |     |
| KSR3-Clytia-hemispherica/1-517               | 1   | -----MDN-----KMAD-----                                                                                                                                              | 7   |
| KSR3-Schmidtea-mediterranea/1-666            | 174 | -----PTKSKTENNVS-----SR-----NLKQPSPKLP-----PKR-----SS-----SNGAGCGYVSI-----                                                                                          | 212 |
| KSR3-Rhipicephalus-sanguineus/1-675          | 210 | -----ARKKLVLSHQ-----PA-----AAT-----P-----CT-----                                                                                                                    | 230 |
| KSR3-Limulus-polyphemus/1-686                | 172 | -----TRKKLKAFLKNSQKSAV-----IG-----LTCSSR-----ACT-----                                                                                                               | 201 |
| KSR3-Limulus-polyphemus-isoformB/1-671       | 168 | -----TRKKLKAFLKNC-----PRS-----NS-----AVLS-----LTCSSR-----ACT-----                                                                                                   | 197 |
| KSR3-Lingula-anatina/1-626                   | 158 | -----ETSSR-----SYSSRASS-----                                                                                                                                        | 170 |
| KSR3-Crassostrea-gigas/1-585                 | 138 | -----RNV-----RTIAIDPL-----S-----                                                                                                                                    | 150 |
| KSR3-Nematostella-vectensis/1-640            | 155 | -----SPARYTR-----D-----GD-----L-----MHDS-----PR-----R-----FT-----SPA-----HEQY-----LP-----CP-----                                                                    | 185 |
| KSR3-Acropora-millepora/1-634                | 150 | -----RY-----PT-----PEKY-----PTHVCE-----NLTT-----IDK-----P-----LLAS-----PR-----S-----IHSEHLLSS-----                                                                  | 187 |
| KSR3-Priapulus-caudatus/1-533                | 133 | -----DVI-----                                                                                                                                                       | 135 |
| KSR3-Saccoglossus-kowaleskii/1-591           | 142 | -----TVAVL-----NDSVCTDDVF-----IDS-----GIHT-----PLN-----LN-----                                                                                                      | 168 |
| KSR3-Ptychodera-flava/1-629                  | 166 | -----DCTVL-----N-----DSMNDEVF-----VDS-----GIHT-----PLN-----LTS-----                                                                                                 | 192 |
| KSR3-Trichoplax-adherens/1-510               | 51  | -----DKT-----ST-----F-----LEMHCDSH-----SD-----PNICT-----PG-----VK-----N                                                                                             | 77  |
| KSR3-Capitella-teleta/1-642                  | 165 | -----SKVSLD-----LT-----G-----CE-----I-----SLSSA-----HS-----P-----RES-----HR-----GY-----HAS-----V                                                                    | 196 |
| KSR3-Eucidaris-tribuloides/1-545             | 135 | -----ATEQRL-----SVS-----S-----Y-----TS-----NR-----K-----G-----RI-----SR-----S                                                                                       | 157 |
| KSR3-Strongylocentrotus-purpuratus/1-602     | 138 | -----TTRQRL-----STT-----TV-----PKD-----SL-----GR-----V-----SR-----S                                                                                                 | 160 |
| KSR3-Paracentrotus-lividus-RNAseq/1-600      | 137 | -----TTRQRL-----STA-----AAAE-----STR-----KDHT-----L-----GL-----V-----SR-----                                                                                        | 162 |
| KSR3-Notospermus-geniculatus/1-691           | 209 | -----DTLQ-----G-----FS-----F-----SPA-----RHL-----SD-----GD-----G-----END-----PH-----V-----ST-----TE                                                                 | 237 |
| KSR3-Aplysia-californica/1-405               |     | -----                                                                                                                                                               |     |
| KSR3-Amphiura-filiformis-partial/1-642       | 232 | -----EDRDS-----L-----CLA-----P-----E-----S-----ST-----T-----D-----S-----                                                                                            | 248 |
| KSR3-Platynereis-dumerilli/1-704             | 219 | -----SI-----H-----SNR-----SQ-----DLL-----QL-----LA-----H-----MP-----E-----EF-----D-----DR-----G-----S-----CI-----H-----H                                            | 249 |
| KSR3-Patiria-miniata/1-779                   | 321 | -----K-----W-----SR-----G-----ER-----SK-----TV-----DV-----TR-----KR-----DA-----EM-----K-----S-----LI-----AT-----WP-----P-----H-----G-----H-----SH-----I-----KA----- | 361 |
| KSR3-Anneissia-japonica/1-590                | 148 | -----AF-----N-----FN-----FS-----S-----MP-----SS-----P-----S-----G-----                                                                                              | 162 |
| KSR3-Parastichopus-parvimensis-partial/1-330 |     | -----                                                                                                                                                               |     |





*BRAF-Capitella-teleta/1-419*  
*BRAF-Priapulus-caudatus/1-368*  
*CRAF-Homo-sapiens/1-648*  
*ARAF-Homo-sapiens/1-606*  
*RAF-Caenorhabditis-elegans/1-813*  
*Raf-Rhipicephalus-sanguineus/1-803*  
*BRAF-Limulus-caudatus/1-781*  
*RAF-Ramazzottius-variornatus/1-885*  
*RAF-Schmidtea-mediterranea/1-737*  
*RAF-Amphimedon-queenslandica/1-904*  
*RAF-Clytia-hemispherica/1-792*  
*BRAF-Crassostrea-gigas/1-688*  
*RAF-Nematostella-vectensis/1-730*  
*RAF-Acropora-millepora/1-729*  
*BRAF-Homo-sapiens/1-766*  
*BRAF-Danio-erio/1-777*  
*BRAF-Eucidaris-tribuloides-partial/1-725*  
*BRAF-Strongylocentrotus-purpuratus/1-803*  
*BRAF-Paracentrotus-lividus-RNAseq/1-746*  
*BRAF-Paracentrotus-lividus-contigEST/1-716*  
*BRAF-Saccoglossus-kowaleskii/1-733*  
*RAF-Parastichopus-parvimensis/1-747*  
*BRAF-Branchiostoma-floridae/1-831*  
*BRAF-Trichoplax-adherens-partial/1-325*  
*BRAF-Patiria-miniata-partial/1-819*  
*KSR1-Caenorhabditis-elegans/1-771*  
*KSR2-Caenorhabditis-elegans/1-550*  
*KSR1-Amphimedon-queenslandica/1-1246*  
*KSR1-Patiria-miniata/1-787*  
*KSR1-Anneissia-japonica/1-885*  
*KSR1-Parastichopus-parvimensis/1-879*  
*KSR1-Eucidaris-tribuloides/1-873*  
*KSR1-Strongylocentrotus-purpuratus/1-869*  
*KSR1-Paracentrotus-lividus/1-848*  
*KSR1-Trichoplax-adherens/1-966*  
*KSR1-Schmidtea-mediterranea/1-954*  
*KSR1-Priapulus-caudatus-partial/1-248*  
*KSR1-Clytia-hemispherica/1-881*  
*KSR1-Nematostella-vectensis-partial/1-917*  
*KSR1-Acropora-millepora/1-957*  
*KSR1-Drosophila-melanogaster/1-966*  
*KSR1-Crassostrea-gigas/1-859*  
*KSR1-Saccoglossus-kowaleskii/1-898*  
*KSR1-Branchiostoma-floridae/1-865*  
*KSR1-Capitella-teleta/1-536*  
*KSR1-Rhipicephalus-sanguineus/1-864*  
*KSR1-Limulus-polyphemus/1-603*  
*KSR3-Ramazzottius-variornatus-partial/1-451*  
*KSR2-Homo-sapiens/1-950*  
*KSR2-Danio-erio/1-966*  
*KSR1-Homo-sapiens/1-923*  
*KSR1-Danio-erio/1-898*  
*KSR3-Clytia-hemispherica/1-517*  
*KSR3-Schmidtea-mediterranea/1-666*  
*KSR3-Rhipicephalus-sanguineus/1-675*  
*KSR3-Limulus-polyphemus/1-686*  
*KSR3-Limulus-polyphemus-isoformB/1-671*  
*KSR3-Lingula-anatina/1-626*  
*KSR3-Crassostrea-gigas/1-585*  
*KSR3-Nematostella-vectensis/1-640*  
*KSR3-Acropora-millepora/1-634*  
*KSR3-Priapulus-caudatus/1-533*  
*KSR3-Saccoglossus-kowaleskii/1-591*  
*KSR3-Ptychodera-flava/1-629*  
*KSR3-Trichoplax-adherens/1-510*  
*KSR3-Capitella-teleta/1-642*  
*KSR3-Eucidaris-tribuloides/1-545*  
*KSR3-Strongylocentrotus-purpuratus/1-602*  
*KSR3-Paracentrotus-lividus-RNAseq/1-600*  
*KSR3-Notospermus-geniculatus/1-691*  
*KSR3-Aplysia-californica/1-405*  
*KSR3-Amphiura-filliformis-partial/1-642*  
*KSR3-Platynereis-dumerilii/1-704*  
*KSR3-Patiria-miniata/1-779*  
*KSR3-Anneissia-japonica/1-590*  
*KSR3-Parastichopus-parvimensis-partial/1-330*

408 - ALACML **P** G E L S L ----- 419  
-----  
-----  
378 **P** L V D C T **P** L **G** S N S **P** S S ----- T C S S **P** - **P** G ----- G L I ----- 402  
395 ----- S S H L ----- T L **P** H **P** S **G** S A - Y ----- K R H A F A **Y** A S Q R - 420  
392 ----- K R R Q L ----- E L **P** C **P** G **G** S **P** - **G** ----- S - L A L **P** Y Q Q - - 414  
474 ----- ----- ----- ----- D L I A S Q Q 480  
333 ----- S L S **G** S H N A ----- T S N H S **G** H N S A ----- N N S Y S N F Y - - - 360  
434 T **G** M D A M R I E R R R K **G** H ----- K R Q S ----- S A G H L D **Y** S **G** V E D 464  
389 ----- S **G** R G R I T N T L F T **P** T S V S A **P** N S ----- **G** E N Y F D F N T A N S 421  
305 ----- K E K R H A S ----- D G T C S K **P** T **P** K H ----- R Y **G** S Q - - - 327  
333 ----- R L M R S S R H **G** R ----- H K S E S A T H **P** R I ----- N D I F H D N N V H **P** - 364  
331 ----- S S K L **P** N R R H S R ----- T S S V **G** T A N **P** R L ----- **Y** ----- 353  
-----  
-----  
338 ----- ----- ----- ----- L Q 339  
378 T A S A A V N I H **G** A H **G** G G ----- H **G** K V L T **P** N S A V ----- Q D **G** V F D **Y** D **P** T N I 415  
-----  
-----  
323 ----- C ----- ----- K T R Q T **P** T **P** S ----- K D S V F D **Y** S **P** A S I 344  
343 ----- M **P** S R K N K ----- ----- A Q H ----- Q E **G** Y F D Y N V L A - 363  
389 ----- F A S K S N R R H A S ----- V S S T **P** T - H T A M ----- E V S V F D **Y** S **P** A A I 421  
-----  
-----  
403 ----- A V S V A R **P** R - Q - I S F T **P** T I L S A **G** ----- ----- R D T V F D **Y** S **P** T S A 434  
339 ----- ----- ----- N V S S L T A **P** Y R ----- ----- S E R K F L **F** **P** D T E N 360  
200 ----- ----- ----- N V H K T ----- ----- ----- 204  
737 ----- S S ----- **P** C L T **P** M S **P** R S **P** L D **P** P V E Y S **G** F N S L H R S I A I V L S T D D N 775  
480 ----- S S S S T T ----- **P** - **P** T **P** A H **P** S **P** S ----- **P** H M D **P** C K ----- **P** Q F Q - - - 506  
488 ----- S S A S A T ----- **P** S V - - H S ----- **P** H V R - - E - F D **G** F V N D V T 514  
482 ----- S S A S **P** T ----- **P** S S - S I Q A S **P** N - **P** G - L - E - S Q F T **F** **P** D V T V 511  
473 ----- **P** S S S I ----- T **P** S **P** A Q **P** S **P** R - I S S S - V - **P** Q F K **F** **P** D I **P** 504  
470 ----- T S **G** I **P** L ----- **P** S **P** S **P** A L **P** S **P** S ----- **P** R M M - V - **P** Q F K **F** **P** D V S 501  
452 ----- T **G** M **P** P ----- **P** S **P** A Q **P** S **P** S ----- **P** L M S - V - **P** Q F K **F** **P** D V S 481  
527 ----- Q G A D ----- K I K S I **P** N S A **P** P T S V N S ----- T F N F S T **P** T D 555  
556 ----- **G** Y N S A V N N H I S **P** R ----- ----- H **P** N K L L K T ----- Q K F D **F** S K I D E 586  
243 ----- S A E S ----- ----- ----- V F ----- ----- 248  
467 ----- ----- ----- ----- F H S D S **P** L **G** 474  
499 ----- **G** R A D ----- Y S **P** G E ----- E Q D **G** F **P** T Q ----- D H F Y **Y** **P** S R Y **G** 525  
552 ----- S V S T S - T C L S A Q E ----- ----- E L D Q **F** **P** **G** S ----- H - **F** **P** **F** S - D V S 579  
489 ----- R E R E L - - D Q A **G** S S S A N L L **P** T **P** S L **G** K H **P** S ----- Q F N **F** **P** N V T V 525  
467 ----- ----- T **P** S **P** ----- A N T Q N L T ----- T F T **F** **P** E I V E 486  
494 ----- S S T T S - S I S **P** A Q **P** ----- ----- S **P** L T R Q T ----- H F D **F** **P** **P** N N 522  
467 ----- ----- S D S Q ----- **P** S **P** M T R Q ----- A F R **F** **P** V L V K 486  
114 ----- S A V M M - - S - S **G** **G** S M ----- A S **P** Q **F** **G** S ----- Q F T **F** **P** E I S T 140  
464 ----- A S R ----- Q N T **P** ----- S S A S R L Q ----- Q F H **F** **P** E I L S 486  
201 ----- S - A ----- Q Q T **P** ----- **P** S A S R L E ----- Q F **F** **P** D L N N 222  
1 ----- ----- M E T C S A T T **P** A N K ----- ----- ----- 12  
536 ----- L ----- **P** P S A T **P** S **P** L **H** **P** ----- S **P** Q C ----- T R Q Q K N F N L **P** A - 563  
551 ----- L ----- **P** P S A T **P** S **P** L **H** **P** ----- S **P** Q S ----- A R Q Q K S N L T A - - 578  
463 ----- **P** ----- T S S N **P** S S A T T **P** **P** ----- N **P** S **P** ----- **G** Q R D S R F N **F** A - 490  
445 ----- Q ----- Q S N **P** S V T **P** P P N ----- **P** S **P** K ----- **G** H R D N R F H **F** A - 472  
10 ----- ----- V T T C A S M L Y A L F ----- Q K ----- R K R K C S C L C H T A 35  
232 ----- L ----- S A D S **G** R Q N D V S S R S **G** S ----- ----- T R N S I **Y** S L D - - 257  
251 ----- S S **G** Y I S S S A S A - V Q T **P** S ----- ----- D T E L D C R **G** A - 276  
229 ----- S S S C L S S - T S S A - A Q T **P** S ----- ----- D T E S D Y R I R - - 253  
225 ----- S S S C L S S - T S S A - A Q T **P** S ----- ----- D T E S D Y R I R - - 249  
186 ----- R ----- S S V T C S S M H F K **P** P T L L **P** P Q **P** ----- Q Q T E S L S - 214  
170 ----- **P** V ----- **G** C D V N Y V Y I C N K S E T V V ----- Q E ----- Q N T N D V C - - 198  
213 ----- M ----- **P** A S C **P** S S A N S H R ----- ----- ----- 225  
211 ----- A ----- N T S C **P** S S A N S H R ----- ----- ----- 223  
145 ----- K ----- ----- T ----- ----- ----- 146  
190 ----- I ----- A S D ----- T A ----- N Q C C L C E T - - - 203  
214 ----- V ----- ----- A S I ----- **P** ----- H Q N C T C L T - - - 226  
98 ----- Q ----- A S Y T N D E D S L L ----- ----- ----- 109  
211 ----- Y ----- S S N C S S L T L T S L ----- S T ----- T A S D **Y** **P** S S H V 235  
175 ----- L ----- E S D S S F T S D C E T **P** T E L Q V ----- F D ----- V **G** A E **G** C **G** F - 203  
178 ----- Q ----- E S D A S L L S E C D T **P** K E I S V ----- F D ----- S **F** **G** **P** **G** D V T - 206  
179 ----- L ----- E S E C D T **P** K E L S V ----- F D ----- S **F** **G** **P** A D V V - - 201  
263 ----- L ----- S T S T S Y S E I L H D ----- R D ----- R E Y F N **F** A **G** - - 285  
-----  
-----  
266 ----- L ----- S D N C S D V F V T D S ----- F ----- ----- **G** ----- 280  
267 ----- Y ----- S T S C S S L T I T S T ----- S ----- T T T S D **C** **P** **G** - - 288  
377 ----- Y ----- T S E C N S D V F R T Q ----- E E ----- D Q A C L C S S - 399  
178 ----- L ----- **G** S E C N V S T V D S S ----- N **G** ----- I T S C T **C** - - 198  
-----  
-----





*BRAF-Capitella-teleta/1-419*  
*BRAF-Priapulus-caudatus/1-368*  
*CRAF-Homo-sapiens/1-648*  
*ARAF-Homo-sapiens/1-606*  
*RAF-Caenorhabditis-elegans/1-813*  
*Raf-Rhipicephalus-sanguineus/1-803*  
*BRAF-Limulus-caudatus/1-781*  
*RAF-Ramazzottius-variornatus/1-885*  
*RAF-Schmidtea-mediterranea/1-737*  
*RAF-Amphimedon-queenslandica/1-904*  
*RAF-Clytia-hemispherica/1-792*  
*BRAF-Crassostrea-gigas/1-688*  
*RAF-Nematostella-vectensis/1-730*  
*RAF-Acropora-millepora/1-729*  
*BRAF-Homo-sapiens/1-766*  
*BRAF-Danio-erio/1-777*  
*BRAF-Eucidaris-tribuloides-partial/1-725*  
*BRAF-Strongylocentrotus-purpuratus/1-803*  
*BRAF-Paracentrotus-lividus-RNAseq/1-746*  
*BRAF-Paracentrotus-lividus-contigEST/1-716*  
*BRAF-Saccoglossus-kowaleskii/1-733*  
*RAF-Parastichopus-parvimensis/1-747*  
*BRAF-Branchiostoma-floridae/1-831*  
*BRAF-Trichoplax-adherens-partial/1-325*  
*BRAF-Patiria-miniata-partial/1-819*  
*KSR1-Caenorhabditis-elegans/1-771*  
*KSR2-Caenorhabditis-elegans/1-550*  
*KSR1-Amphimedon-queenslandica/1-1246*  
*KSR1-Patiria-miniata/1-787*  
*KSR1-Anneissia-japonica/1-885*  
*KSR1-Parastichopus-parvimensis/1-879*  
*KSR1-Eucidaris-tribuloides/1-873*  
*KSR1-Strongylocentrotus-purpuratus/1-869*  
*KSR1-Paracentrotus-lividus/1-848*  
*KSR1-Trichoplax-adherens/1-966*  
*KSR1-Schmidtea-mediterranea/1-954*  
*KSR1-Priapulus-caudatus-partial/1-248*  
*KSR1-Clytia-hemispherica/1-881*  
*KSR1-Nematostella-vectensis-partial/1-917*  
*KSR1-Acropora-millepora/1-957*  
*KSR1-Drosophila-melanogaster/1-966*  
*KSR1-Crassostrea-gigas/1-859*  
*KSR1-Saccoglossus-kowalevskii/1-898*  
*KSR1-Branchiostoma-floridae/1-865*  
*KSR1-Capitella-teleta/1-536*  
*KSR1-Rhipicephalus-sanguineus/1-864*  
*KSR1-Limulus-polyphemus/1-603*  
*KSR3-Ramazzottius-variornatus-partial/1-451*  
*KSR2-Homo-sapiens/1-950*  
*KSR2-Danio-erio/1-966*  
*KSR1-Homo-sapiens/1-923*  
*KSR1-Danio-erio/1-898*  
*KSR3-Clytia-hemispherica/1-517*  
*KSR3-Schmidtea-mediterranea/1-666*  
*KSR3-Rhipicephalus-sanguineus/1-675*  
*KSR3-Limulus-polyphemus/1-686*  
*KSR3-Limulus-polyphemus-isoformB/1-671*  
*KSR3-Lingula-anatina/1-626*  
*KSR3-Crassostrea-gigas/1-585*  
*KSR3-Nematostella-vectensis/1-640*  
*KSR3-Acropora-millepora/1-634*  
*KSR3-Priapulus-caudatus/1-533*  
*KSR3-Saccoglossus-kowaleskii/1-591*  
*KSR3-Ptychodera-flava/1-629*  
*KSR3-Trichoplax-adherens/1-510*  
*KSR3-Capitella-teleta/1-642*  
*KSR3-Eucidaris-tribuloides/1-545*  
*KSR3-Strongylocentrotus-purpuratus/1-602*  
*KSR3-Paracentrotus-lividus-RNAseq/1-600*  
*KSR3-Notospermus-geniculatus/1-691*  
*KSR3-Aplysia-californica/1-405*  
*KSR3-Amphiura-filiformis-partial/1-642*  
*KSR3-Platynereis-dumerilii/1-704*  
*KSR3-Patiria-miniata/1-779*  
*KSR3-Anneissia-japonica/1-590*  
*KSR3-Parastichopus-parvimensis-partial/1-330*

```

-----
-----
-----
294 ----- SSSPNNL 300
255 ----- RGSPPASV 263
412 ----- NVSGSTTSSLVA AHL H----- 427
421 ----- APPSGLAPPQSSS-----SP-----S 437
415 ----- SSASTNH-----SP-----S 424
486 ----- EVGSGNNLLPVPGR-----TPRTPYSDP-----S 509
361 ----- GQLINNK----- 367
483 HSSSE--RHRH--RSLE--RRSSSGDRTSATPDS----- 510
430 ----- AQQISGIPDS----- 439
328 ----- RNNTLPVLT-----S-----N-Q 340
367 ----- DTG SVGLPNGHA-----H-----Q-S 382
354 ----- ENMNSLVPNN----- 363
400 ----- AT-PPASLPGSLTNVK----- 414
411 ----- AT-PPASLPGSLPNVK----- 425
343 ----- LASSLPN-T-----N-----M-I 353
419 ----- LASSLPNT-R-----N-----L-I 430
364 ----- ASSLPNTTN-----M-----I-V 375
334 ----- ASSLPNTTN-----M-----I-V 345
355 ----- T S--SGYSMVGCASLPNS-----T-----S 373
364 ----- LTNSLPNS-----E-----Q 373
432 ----- LS-VT PP-AYLSSSIPNS-----Q-----S 449
-----
-----
438 ----- M-ASLASSLPNS-----V-----V 450
386 ETENH-----NKSAASMSGNIE-----S E 405
-----
812 VGP AHNRC LKLP SRGI-----AAQSLPNLLMAERRQSRGGGANGEGLYATS EDN----- 860
-----
522 ----- NVETSQ-----S----- 528
518 ----- DQVRSI-----N----- 524
515 ----- DNVHSI-----S----- 521
512 ----- ENVTST-----S----- 518
489 ----- ENVTST-----S----- 495
579 ----- MNTSTHLYSP-----V S----- 591
-----
-----
500 ----- LVGEISLVNSLISTT-----STVSE----- 519
539 ----- STGTLT----- 544
593 ----- STSTLT----- 598
561 VSSSN--GHMSSLIGSQTSNASTAATLTGSLVNST-----TTTSTCSFFPRKLS----- 607
499 ----- S-----VS----- 501
535 ----- EILLTP-----T----- 541
500 ----- SVRFRGGQSRQRHH-----F----- 515
153 ----- LSALNAKETASSITLTDSELLGN----- 174
497 ----- SL----- 498
234 ----- PK----- 235
25 LLAR-----MS--RWIRKSEAIK-PSI-----SITCCMDEPVEPL 56
589 ----- PQVI-----LHPVT-----SNPILEG 604
602 ----- PQVI-----LHPVL-----SEPKK 617
516 IA-----ESLKENA-FNISAF AH-----A-APLPEA 539
494 HS-----DGLPDTV-NEIDP SVE-----EMHAEQDEE 519
80 RK-----PKKKKIKLQIEHT-----GSSCNLMSPK-NK 107
287 RN-----P-----RVFGNQAL-----SH 299
292 ----- LV-----RQ 295
293 K S-----E-----NKNSSVNS-----NR 305
282 MS-----D-----TKLPDVNC-----NH 294
236 TV-----H-PGAAGACQDKGQSKSSQTY-----CH 259
212 HV-----SAIHVR IKDVS P-----ER 227
239 LTAT-----LE-RYNVEEE----- 251
237 LRAS-----LE-QYEDEEHSCS-----RE 254
157 ----- VLN-----QH 161
227 ----- QSSSC-----RQ 233
254 ----- RSVAT-----RT 260
114 S S-----IYSSSFYSDSFNSLGLVT-----S 135
280 RN-----IFAN-----R 286
220 QH-----HWVRDKSMTVCA----- 233
218 HE-----AWAATK PAPTST----- 231
215 HD-----AWVATK PAVST----- 228
295 VF-----DWQKSNEKY--LSLS-PAA-----AH 314
14 LR-----Q-SRNKYMKLLQKAGQLSP-----CR 35
295 HR-----KWSRGERSKTVDATST----- 312
305 LS-----KWINTKEDCKYLEVNDHRT-----RH 327
414 QR-----KWSRGERSK----- 424
213 RT-----RWC GCKAR----- 222
-----
-----

```



|                                              |     |     |
|----------------------------------------------|-----|-----|
| -----                                        |     |     |
| BRAF-Capitella-teleta/1-419                  |     |     |
| BRAF-Priapulus-caudatus/1-368                |     |     |
| CRAF-Homo-sapiens/1-648                      | 301 | 315 |
| ARAF-Homo-sapiens/1-606                      | 264 | 277 |
| RAF-Caenorhabditis-elegans/1-813             | 428 | 440 |
| Raf-Rhipicephalus-sanguineus/1-803           | 438 | 457 |
| BRAF-Limulus-caudatus/1-781                  | 425 | 444 |
| RAF-Ramazzottius-variornatus/1-885           | 510 | 529 |
| RAF-Schmidtea-mediterranea/1-737             | 368 | 382 |
| RAF-Amphimedon-queenslandica/1-904           | 511 | 537 |
| RAF-Clytia-hemispherica/1-792                | 440 | 449 |
| BRAF-Crassostrea-gigas/1-688                 | 341 | 355 |
| RAF-Nematostella-vectensis/1-730             | 383 | 388 |
| RAF-Acropora-millepora/1-729                 | 364 | 379 |
| BRAF-Homo-sapiens/1-766                      | 415 | 426 |
| BRAF-Danio-erio/1-777                        | 426 | 436 |
| BRAF-Eucidaris-tribuloides-partial/1-725     | 354 | 375 |
| BRAF-Strongylocentrotus-purpuratus/1-803     | 431 | 457 |
| BRAF-Paracentrotus-lividus-RNAseq/1-746      | 376 | 402 |
| BRAF-Paracentrotus-lividus-contigEST/1-716   | 346 | 372 |
| BRAF-Saccoglossus-kowaleskii/1-733           | 374 | 389 |
| RAF-Parastichopus-parvimensis/1-747          | 374 | 399 |
| BRAF-Branchiostoma-floridae/1-831            | 450 | 472 |
| BRAF-Trichoplax-adherens-partial/1-325       |     |     |
| BRAF-Patiria-miniata-partial/1-819           | 451 | 470 |
| KSR1-Caenorhabditis-elegans/1-771            | 406 | 418 |
| KSR2-Caenorhabditis-elegans/1-550            |     |     |
| KSR1-Amphimedon-queenslandica/1-1246         | 861 | 893 |
| KSR1-Patiria-miniata/1-787                   |     |     |
| KSR1-Anneissia-japonica/1-885                | 529 | 545 |
| KSR1-Parastichopus-parvimensis/1-879         | 525 | 538 |
| KSR1-Eucidaris-tribuloides/1-873             | 522 | 535 |
| KSR1-Strongylocentrotus-purpuratus/1-869     | 519 | 532 |
| KSR1-Paracentrotus-lividus/1-848             | 496 | 509 |
| KSR1-Trichoplax-adherens/1-966               | 592 | 618 |
| KSR1-Schmidtea-mediterranea/1-954            | 601 | 618 |
| KSR1-Priapulus-caudatus-partial/1-248        |     |     |
| KSR1-Clytia-hemispherica/1-881               | 520 | 542 |
| KSR1-Nematostella-vectensis-partial/1-917    | 545 | 567 |
| KSR1-Acropora-millepora/1-957                | 599 | 621 |
| KSR1-Drosophila-melanogaster/1-966           | 608 | 639 |
| KSR1-Crassostrea-gigas/1-859                 | 502 | 526 |
| KSR1-Saccoglossus-kowaleskii/1-898           | 542 | 556 |
| KSR1-Branchiostoma-floridae/1-865            | 516 | 537 |
| KSR1-Capitella-teleta/1-536                  | 175 | 202 |
| KSR1-Rhipicephalus-sanguineus/1-864          | 499 | 527 |
| KSR1-Limulus-polyphemus/1-603                | 236 | 264 |
| KSR3-Ramazzottius-variornatus-partial/1-451  | 57  | 111 |
| KSR2-Homo-sapiens/1-950                      | 605 | 616 |
| KSR2-Danio-erio/1-966                        | 618 | 629 |
| KSR1-Homo-sapiens/1-923                      | 540 | 559 |
| KSR1-Danio-erio/1-898                        | 520 | 557 |
| KSR3-Clytia-hemispherica/1-517               | 108 | 153 |
| KSR3-Schmidtea-mediterranea/1-666            | 300 | 342 |
| KSR3-Rhipicephalus-sanguineus/1-675          | 296 | 344 |
| KSR3-Limulus-polyphemus/1-686                | 306 | 353 |
| KSR3-Limulus-polyphemus-isoformB/1-671       | 295 | 342 |
| KSR3-Lingula-anatina/1-626                   | 260 | 300 |
| KSR3-Crassostrea-gigas/1-585                 | 228 | 266 |
| KSR3-Nematostella-vectensis/1-640            | 252 | 290 |
| KSR3-Acropora-millepora/1-634                | 255 | 289 |
| KSR3-Priapulus-caudatus/1-533                | 162 | 201 |
| KSR3-Saccoglossus-kowaleskii/1-591           | 234 | 265 |
| KSR3-Ptychodera-flava/1-629                  | 261 | 292 |
| KSR3-Trichoplax-adherens/1-510               | 136 | 176 |
| KSR3-Capitella-teleta/1-642                  | 287 | 333 |
| KSR3-Eucidaris-tribuloides/1-545             | 234 | 274 |
| KSR3-Strongylocentrotus-purpuratus/1-602     | 232 | 273 |
| KSR3-Paracentrotus-lividus-RNAseq/1-600      | 229 | 271 |
| KSR3-Notospermus-geniculatus/1-691           | 315 | 358 |
| KSR3-Aplysia-californica/1-405               | 36  | 78  |
| KSR3-Amphiura-filiformis-partial/1-642       | 313 | 347 |
| KSR3-Platynereis-dumerilii/1-704             | 328 | 370 |
| KSR3-Patiria-miniata/1-779                   | 425 | 455 |
| KSR3-Anneissia-japonica/1-590                | 223 | 259 |
| KSR3-Parastichopus-parvimensis-partial/1-330 |     |     |
| -----                                        |     |     |
|                                              |     | 1   |

*BRAF-Capitella-teleta/1-419*  
*BRAF-Priapulus-caudatus/1-368*  
*CRAF-Homo-sapiens/1-648*  
*ARAF-Homo-sapiens/1-606*  
*RAF-Caenorhabditis-elegans/1-813*  
*Raf-Rhipicephalus-sanguineus/1-803*  
*BRAF-Limulus-caudatus/1-781*  
*RAF-Ramazottius-variornatus/1-885*  
*RAF-Schmidtea-mediterranea/1-737*  
*RAF-Amphimedon-queenslandica/1-904*  
*RAF-Clytia-hemispherica/1-792*  
*BRAF-Crassostrea-gigas/1-688*  
*RAF-Nematostella-vectensis/1-730*  
*RAF-Acropora-millepora/1-729*  
*BRAF-Homo-sapiens/1-766*  
*BRAF-Danio-erio/1-777*  
*BRAF-Eucidaris-tribuloides-partial/1-725*  
*BRAF-Strongylocentrotus-purpuratus/1-803*  
*BRAF-Paracentrotus-lividus-RNAseq/1-746*  
*BRAF-Paracentrotus-lividus-contigEST/1-716*  
*BRAF-Saccoglossus-kowaleskii/1-733*  
*RAF-Parastichopus-parvimensis/1-747*  
*BRAF-Branchiostoma-floridae/1-831*  
*BRAF-Trichoplax-adherens-partial/1-325*  
*BRAF-Patiria-miniata-partial/1-819*  
*KSR1-Caenorhabditis-elegans/1-771*  
*KSR2-Caenorhabditis-elegans/1-550*  
*KSR1-Amphimedon-queenslandica/1-1246*  
*KSR1-Patiria-miniata/1-787*  
*KSR1-Anneissia-japonica/1-885*  
*KSR1-Parastichopus-parvimensis/1-879*  
*KSR1-Eucidaris-tribuloides/1-873*  
*KSR1-Strongylocentrotus-purpuratus/1-869*  
*KSR1-Paracentrotus-lividus/1-848*  
*KSR1-Trichoplax-adherens/1-966*  
*KSR1-Schmidtea-mediterranea/1-954*  
*KSR1-Priapulus-caudatus-partial/1-248*  
*KSR1-Clytia-hemispherica/1-881*  
*KSR1-Nematostella-vectensis-partial/1-917*  
*KSR1-Acropora-millepora/1-957*  
*KSR1-Drosophila-melanogaster/1-966*  
*KSR1-Crassostrea-gigas/1-859*  
*KSR1-Saccoglossus-kowaleskii/1-898*  
*KSR1-Branchiostoma-floridae/1-865*  
*KSR1-Capitella-teleta/1-536*  
*KSR1-Rhipicephalus-sanguineus/1-864*  
*KSR1-Limulus-polyphemus/1-603*  
*KSR3-Ramazottius-variornatus-partial/1-451*  
*KSR2-Homo-sapiens/1-950*  
*KSR2-Danio-erio/1-966*  
*KSR1-Homo-sapiens/1-923*  
*KSR1-Danio-erio/1-898*  
*KSR3-Clytia-hemispherica/1-517*  
*KSR3-Schmidtea-mediterranea/1-666*  
*KSR3-Rhipicephalus-sanguineus/1-675*  
*KSR3-Limulus-polyphemus/1-686*  
*KSR3-Limulus-polyphemus-isoformB/1-671*  
*KSR3-Lingula-anatina/1-626*  
*KSR3-Crassostrea-gigas/1-585*  
*KSR3-Nematostella-vectensis/1-640*  
*KSR3-Acropora-millepora/1-634*  
*KSR3-Priapulus-caudatus/1-533*  
*KSR3-Saccoglossus-kowaleskii/1-591*  
*KSR3-Ptychodera-flava/1-629*  
*KSR3-Trichoplax-adherens/1-510*  
*KSR3-Capitella-teleta/1-642*  
*KSR3-Eucidaris-tribuloides/1-545*  
*KSR3-Strongylocentrotus-purpuratus/1-602*  
*KSR3-Paracentrotus-lividus-RNAseq/1-600*  
*KSR3-Notospermus-geniculatus/1-691*  
*KSR3-Aplysia-californica/1-405*  
*KSR3-Amphiura-filiformis-partial/1-642*  
*KSR3-Platynereis-dumerilii/1-704*  
*KSR3-Patiria-miniata/1-779*  
*KSR3-Anneissia-japonica/1-590*  
*KSR3-Parastichopus-parvimensis-partial/1-330*

```

-----
316 ----- R E R A P
278 ----- Q R E R
441 ----- K - - I - - - - S - P G - F - - - - F R N R S R
458 ----- R - - - - P R A R S A
445 ----- R - - - - P R A R S A
530 - S S D S S L N
383 - - - S G D H
538 - S G D S G L G - - G S - R S S - T S Y S S - S T - L - - - P S Q R R R
450 ----- R I R S
-----
389 ----- H K
380 ----- G - - - - T - V - - - - I C - - - - G R S
427 ----- K - - - - S S - S S
437 ----- K - - - - P S - S S
376 - - S D S K D S - - - K - H - - - -
458 - G S D S K D N - - - K - I - - - -
403 - G S E H K D N - - - K - I - - - -
373 - G S E H K D N - - - K - I - - - -
390 ----- K - P R - T - - - P S - S S
400 ----- S S S T S
473 - K S A S D D G - - - S - V - - - - M K - K K - E - - - - K A H R H K
-----
471 - K - - - - - - - - - - - - - - - N - R G - P - - - - P S S T S S
419 Q E V D S E - A A P S Q E A - - - - V D K F N K R A D - G G F T W E R - - - - H A W N M S
214 - - - - - T L D D - - - - V T T F N S E I N - E - - - -
894 - D D D D D S Y A - D S E - G - - V G S S G - - - - L - D E P E V N K
507 - P D S E R T L - P E K - - - - V E C I D D V - D - - - - M - S D Q V L H R K N
546 T N T D S E K T L - P G K - W - - G S I D S N V - S D S E - - - - L - N E V S H - R K
539 P F T D S E R T L - P D Q - G - - V E S L D Y A - S D S G - - - - S - S D H V L - V R
536 P F T D S E R T L - P E Q - - - - V E P V D Y T - S D P E - - - - P - - V V T - T R
533 P F T D S E R T L - P E Q - - - - V E P V D E V - S D P E - - - - P - N I L L A - T R
510 P F T D S E R T L - P E H - - - - V D P V D E I - T D P E - - - - P - N P V - A - T R
619 A E D D L - - - E - D N R - D - - C E N I E S E R S S G N E D H S Q E D L L T V N R K S R Y K R R K
619 - - - - - N K - L N Q - R - - F E S T E S Q D - - - - E - - S S H L S
-----
543 - - - - - Q E - - E E N - S - - V D D L D D Q I S D I R - - - - K - - H V - - - - 563
568 - - - - - G - D V P - G - - V E D L E I Q I S D V D - - - - P - - E S R K W G Q R V A S 596
622 - - - - - D - D A P - R - - V D V L G K Q I S D F D - - - - S - - H T R T W G R R E - - 648
640 A S T D S D R - - T P V - R - - V D S T E - - - - D - - - - G - - D S G Q W R Q - - - 664
527 - - - - - K - T L E - R - - E D S I D S Q - - - - D - - - - G - - I I H H W D R G - N - 549
557 L D T D S E R - T - L P S - K - - V D S I D S Q A S D F D - - - - P - - L D Q S W S R K S - 590
538 - - - - - S D K T E - V A - - - - - - - - - - - D V S A - - - - L - F S R S W P T R Q N - 559
203 - - - - - D N R S S - V L D - R - - V D S T E S G - E D G G - - - - G - - Q G L S W S R V - 231
528 - - - - - D S E K T L - A S T - R - - V D S Q D S Q V S D L D - - - - P - - T D R L W P R Q - 558
265 H Q T D S E K T - L A D - R - - V D S Q D S Q V S D M D - - - - P - - N E R S W P R Q - 297
112 E P S C S S - - - - - S - - - T - E A F F P - - - - R D A L F E R - - - - L - 132
617 - - - - - E N E - - - - E - V H - D - - E A E E S - - E D - D F E E M - N L S - - L L S A R S F - 645
630 - - - - - D N E - - - - E - G N - D - - E A E G S - - A D - E F E E M - N L S - - L L S A R N F - 658
560 E A E E P E - - - - - A - G K - - - S - E A E D D - - E D - E V D D L - P S S R - R P W R G P I - 592
558 E D L E D L - - - - - N - G G - - - S - E G E C E - - G D - E L D D L - P S A R G G H W K G P I - 591
154 D F K S S S K G S P F L P G S G - - - - Y S H - P K I - - - - L - T F N R T - - - - P - 182
343 N D L M S N - - - - - C - - - - D E - D F I L E - - - - - - - - - - - - - - - 356
345 E N F L E E - - - - - P - - - - - E S G I E - - - - E - S E Q - - - - E D - - - - K S - 364
354 D F V D D D - - - - - S - - - - - E S G I G - - - - D - C E D - - - - Q D E - - - - F P S - 375
343 D L I D D D - - - - - S - - - - - E S G I G - - - - D - C E D - - - - Q D E - - - - C S S - 364
301 E N E E G D - - - - - - - - - - N D S V F L E E - - - - G E - D I D C V - S - - - - N - 323
267 E E C D - P - - - - - T - F E K - - - - L - - - - - - - - - - - - - - - - - - - 277
291 N T R R - I - - - - V S V D N C Q T S - S E R - - R E Y M - - R L - F P - - - - P - - - - F D E - 319
290 K A K K V - - - - F S A D D F Q R - - - - - F Q F H - - E K - T P I S - K C E - - - - N K E - 320
202 I F D D D E - - - - - Y D E T F A S L L - - - - G S - T L Q S N - - - - - - - - - - - A - 224
266 - S - - - - - S - - - - - S G E I Y - - - - D - W Q V E S - Q A V - - - - - Q Y E - 284
293 - L D C I C - - - - - - - - - - S S G L Y - - - - D - W Q Q E L - D R Q - - - - - Q F P - 314
177 N T Q F S Y Q G T P V S S P P Y N G H N N Y E R - L H L V S - - G D - A F - - - - - - - - 209
334 H G I H L P - - - - - G S - - - - N E - V D D L E - - - - G S - V F G D D - E S E - - - - K I E - 361
275 T S D D - P - - - - - S T - - - - A I - E E R V A - - - - D - W M R D Y - E N S - - - - S Y R - 300
274 I P E N - N - - - - C N - - - - S N - D Q M V S - - - - D - W T E E Y - R R S - - - - S L H - 299
272 I P E N - N - - - - C N - - - - S N - D Q A V S - - - - D - W A E E Y - Q R S - - - - S L H - 297
359 D D D L - D - - - - L P S V F D E - V F V - - - - - T P D T P - Q N - - - - - E - 381
79 D D E S - V - - - - - V G D - - - - S E M E - - - - L - P F I Q E - M S - - - - - Y - 99
348 D D T V - P - - - - - S S - - - - L E D - A H R L C - - - - D - W L K A S - S N - - - - Y - 371
371 S D E F - D - - - - E Y - E E S - V F D F K - - - - E - N E H G E - P A - - - - - N - 394
456 A D A V - P - - - - E S - I D D - A H R M C - - - - D - S L A A S - R H - - - - - A - 479
260 N E D V - P - - - - - N S - - - - I E D - A Q R I C - - - - D - W M K I Q - T A - - - - - T - 283
2 Q D D V - C - - - - - D E - - - - I - - - - E D R V Q - - - - E - W L K G A - D N - - - - E - 23

```



BRAF-Capitella-teleta/1-419  
 BRAF-Priapulul-caudatus/1-368  
 CRAF-Homo-sapiens/1-648  
 ARAF-Homo-sapiens/1-606  
 RAF-Caenorhabditis-elegans/1-813  
 Raf-Rhipicephalus-sanguineus/1-803  
 BRAF-Limulus-caudatus/1-781  
 RAF-Ramazottius-variornatus/1-885  
 RAF-Schmidtea-mediterranea/1-737  
 RAF-Amphimedon-queenslandica/1-904  
 RAF-Clytia-hemispherica/1-792  
 BRAF-Crassostrea-gigas/1-688  
 RAF-Nematostella-vectensis/1-730  
 RAF-Acropora-millepora/1-729  
 BRAF-Homo-sapiens/1-766  
 BRAF-Danio-erio/1-777  
 BRAF-Eucidaris-tribuloides-partial/1-725  
 BRAF-Strongylocentrotus-purpuratus/1-803  
 BRAF-Paracentrotus-lividus-RNaseq/1-746  
 BRAF-Paracentrotus-lividus-contigEST/1-716  
 BRAF-Saccoglossus-kowaleskii/1-733  
 RAF-Parastichopus-parvimensis/1-747  
 BRAF-Branchiostoma-floridae/1-831  
 BRAF-Trichoplax-adherens-partial/1-325  
 BRAF-Patiria-miniata-partial/1-819  
 KSR1-Caenorhabditis-elegans/1-771  
 KSR2-Caenorhabditis-elegans/1-550  
 KSR1-Amphimedon-queenslandica/1-1246  
 KSR1-Patiria-miniata/1-787  
 KSR1-Anneissia-japonica/1-885  
 KSR1-Parastichopus-parvimensis/1-879  
 KSR1-Eucidaris-tribuloides/1-873  
 KSR1-Strongylocentrotus-purpuratus/1-869  
 KSR1-Paracentrotus-lividus/1-848  
 KSR1-Trichoplax-adherens/1-966  
 KSR1-Schmidtea-mediterranea/1-954  
 KSR1-Priapulul-caudatus-partial/1-248  
 KSR1-Clytia-hemispherica/1-881  
 KSR1-Nematostella-vectensis-partial/1-917  
 KSR1-Acropora-millepora/1-957  
 KSR1-Drosophila-melanogaster/1-966  
 KSR1-Crassostrea-gigas/1-859  
 KSR1-Saccoglossus-kowaleskii/1-898  
 KSR1-Branchiostoma-floridae/1-865  
 KSR1-Capitella-teleta/1-536  
 KSR1-Rhipicephalus-sanguineus/1-864  
 KSR1-Limulus-polyphemus/1-603  
 KSR3-Ramazottius-variornatus-partial/1-451  
 KSR2-Homo-sapiens/1-950  
 KSR2-Danio-erio/1-966  
 KSR1-Homo-sapiens/1-923  
 KSR1-Danio-erio/1-898  
 KSR3-Clytia-hemispherica/1-517  
 KSR3-Schmidtea-mediterranea/1-666  
 KSR3-Rhipicephalus-sanguineus/1-675  
 KSR3-Limulus-polyphemus/1-686  
 KSR3-Limulus-polyphemus-isoformB/1-671  
 KSR3-Lingula-anatina/1-626  
 KSR3-Crassostrea-gigas/1-585  
 KSR3-Nematostella-vectensis/1-640  
 KSR3-Acropora-millepora/1-634  
 KSR3-Priapulul-caudatus/1-533  
 KSR3-Saccoglossus-kowaleskii/1-591  
 KSR3-Ptychodera-flava/1-629  
 KSR3-Trichoplax-adherens/1-510  
 KSR3-Capitella-teleta/1-642  
 KSR3-Eucidaris-tribuloides/1-545  
 KSR3-Strongylocentrotus-purpuratus/1-602  
 KSR3-Paracentrotus-lividus-RNaseq/1-600  
 KSR3-Notospermus-geniculatus/1-691  
 KSR3-Aplysia-californica/1-405  
 KSR3-Amphiura-filiformis-partial/1-642  
 KSR3-Platynereis-dumerillii/1-704  
 KSR3-Patiria-miniata/1-779  
 KSR3-Anneissia-japonica/1-590  
 KSR3-Parastichopus-parvimensis-partial/1-330

```

321 - V S G T Q E K N I R P R G Q R D S Y Y W E I E A S E V M L --- S T R I G S G S F G T V Y K G K W H G D V 372
282 - K S L A D D K K K V K N L G Y R D S Y Y W E V P P S E V Q L --- L K R I G T G S F G T V F R G R W H G D V 333
453 - S P G E R L D A Q R P R P P Q K P H H E D W E I L P N E F I I --- Q Y K V G S G S F G T V Y R G E F F G T V 504
465 -- D E S S K K A I T Q Q K P A R E S I E D W E I M P D E I L T --- G P R I G S G S F G T V Y R G H W H G H V 515
452 -- D E S S K K V --- Q R T T R E S I E D W E I P A N E I L T --- G P R I G S G S F G T V Y R A H W H G P V 499
537 --- L T T S N G Y K L S R V Q R E S M E D W E I P V G E I L I --- G P K V G S G S F G T V Y R G H W Y G P V 586
393 -- R A E S E P R S K D K R T R R D S N E W E I L E S D I T R --- G S R I G S G S F G T V F K G Y W H G N V 443
564 -- Q R T S S E D K R A K V K C K D S D V W E I P Y N E I E V --- G E R I G S G S F G T V Y K G K W H G P V 614
454 --- S S E E H K K P R R R D S N D D W E I Y A D D L K I --- G E R I G S G S F G T V Y K G Y W H G T V 500
356 --- V K H R T V E N H P R E D W E I N G D Q I Q V --- N K R I G S G S F G T V Y R G Y Y H G H V 399
391 -- V P Q S R Y P R G R Q L R A N S T D D W E I L E G E V Q M --- G P R I G S G S Y G T V Y K G N W H G A V 441
388 -- S P Q K P K K M T S P L R T N S T D D W E I P E G E V R R --- G P R I G S G S F G T V Y K G N W H G A V 438
432 -- S E --- D R N R M K T L G R R D S D D W E I P D G Q I T V --- Q Q R I G S G S F G T V Y K G K W H G D V 480
442 -- S E --- D R N K M K T L G R R D S D D W E I P E G Q I T L --- Q Q R I G S G S F G T V Y K G K W H G D V 490
384 --- K --- I M T L P G P R R Q R R D S N D D W E I P A D E I T L --- G P R I G S G S F G T V Y S Q W H G T V 432
467 --- K P P T T L L G H R R T R R D S N D D W E I P E E I R L --- G S R I G A G S F G T V F S Q W H G S V 516
412 --- K A A --- T L P H K R T R R D S N D D W E I P A D E I R L --- C V R I G A G S F G T V F S Q W H G S V 459
382 --- K A A --- T L P H K R T R R D S N D D W E I P A D E I R L --- C V R I G A G S F G T V F S Q W H G S V 429
398 --- T E V R R R T R R R D S N D D W E I P A D E I V I --- G P R I G S G S F G T V Y R Q W H G A V 444
406 -- T E E R V M Q R P K Q R V R R D S N D D W E I P N D E I V A --- G P R I G S G S F G T V Y R Q W H G S V 456
493 -- R E --- D S H T S V V R K P R D S N D D W E I P E E Q I L F --- G P R I G S G S F G T V F K Q W H G P V 541
1 --- T S D D W E I A Q S D I T I --- G P R I G S G S Y G T V F K G H W H G P V 35
482 -- A E --- D T K I R K P R Q R R D S N D D W E I P T D E I L M --- G P R I G S G S F G T V F K G H W H G P V 530
454 --- T I R G P N A A S W N E V T I Q F E T I E F D K Q A P I I G R G R F G K V L R G F H Y G D V 500
228 --- E M D E T V L M T W E D V T I K L T D V D V --- M T K I G D G R F G S V Y F G G Y H G N A 271
920 --- Y R I R H R N S V D E W I I P Y N D L K L --- L E K L G S G P V A E V Y K G Y W H G E V 962
536 --- S H K S N V L S E W D I P P D Q L E I --- T E L I G T G R F G P V Y --- --- 567
578 --- G S K S V L S E W D I P V E K L D I --- K D L I G T G R F G K V Y K G Y W H G D V 617
571 --- K H S N A V A S E W D I P F D Q L E L --- K E L L G L G R F G P V Y R G N W H G E V 610
565 --- K N S Q K L S E W D I P Y E L V I --- X D L I G N G R F G P V H K G K W H G D V 604
564 --- K N S Q K L S E W D I P F E Q L E I --- L D L I G T G R F G A V H --- --- W H G D V 600
540 --- K N S Q K L S E W D I P F E Q L E I --- L D L I G T G R F G A V H K G K W H G D V 579
662 --- K --- L L S M R T S L A S E W I I P I E L K I --- K D V I G I G H F G R V H R G Y W H G D V 704
639 --- R T N S I S V A L K E W E I P Y K N L E L --- G E L L G K G S F W T V F K G K W H G E V 680
564 --- K L R N H G S L M S E W V I P P F S Q I E I --- G D H I G V G R V G K V Y K A K W H G E C 605
597 S R A F G K A Y M L L D L H T R G S L M S E W V P F E E I E I --- F D V L G S R F G K V Y R G R W H G E V 649
649 --- Q R G S L M S E W V I P F E E L D I T --- W N P L G A G R F G K V Y R G H W H G E V 688
665 --- N S I S L K E W D I P Y G D L L L --- L E R I G Q R F G T V H R A L W H G D V 702
550 --- S L S V T L K E W D I P F E Q L K L --- M D K I G T G R F G T V Y K G T W H G Q V 588
591 --- K T S V F S E W D I P Y E D M H I --- L E L I G R G R L G K V F K G Y W H G D V 628
560 --- S R S S V L K E W D I P Y E E L E I --- Q D L I G A G R F G R V F K G K W H G D V 598
232 --- N S M S I K E W D I P Y E E L Q F --- E D R I G D G R F G S V Y K G N W H G D V 269
559 --- N S L S L R E W D I P F D D V Q I --- K E K I G E G R F G S V Y K G S W H G S V 596
298 --- N S L S L R E W D I P F D E L Q I --- E T I G V G R F G V V Y K G N W H G S V 336
133 --- A G E F S H E E G E K D W A I D Y R D L E I --- G A R L Q G N S T G D I Y I G R W H G N V 175
646 --- P R K A S Q T S I F L Q E W D I P F E Q L E I --- G E L I G K G R F G Q V Y H G R W H G E V 689
659 --- P R K A S Q T S I F L Q E W D I P M E Q V E I --- G E L I G K G R F G Q V Y H G R W H G E V 702
593 --- S R K A S Q T S V Y L Q E W D I P F E Q L E I --- G E P I G Q R W R V H R G R W H G E V 636
592 --- S R K A S Q T S V Y L Q E W D I P F E Q L D L --- G E L I G K G R W R V H R G R W H G E V 635
183 --- C E K V E N R P K S F Y E W S I P Y T N I E F --- G E K V A V S P N G P V H R G R W H G D V 226
357 --- R V D K C M K S R N R Y E F N I P F G D I R L --- G E C M K S G N K R K V Y K G H W H G D V 400
365 --- K N Q S T N I K D T L G E W C V P Y K D V E F --- K E R L R Q G R D T D V Y R G R W H G E V 408
376 --- H A Q S L D L K E T L G E W C I P F D D L K F --- D E R L R H G R Q G D I F R G R W H G E V 419
365 --- Q T Q R T D A R E T L G E W C I P F N D L Q F --- G Q R L R H G R Q G D I Y R G R W H G E V 408
324 --- S K A E P P D R N S L S D C M I A F S D L Q F --- S E R I K T G G C L E M H R G Q W H G D V 367
278 --- I D A R S E K H D R L E D F S I A Y E D I E F --- G D C L R V G R Q R S I Y R G R W H G D V 321
320 --- N D E E N I K K S L K E W N I P Y S D L Q F --- G D K V G I G P K G H V Y K G R W H G E I 363
321 --- R R D E N D I K K S L R E W S I P F S D L Q V --- G E I V G V G P K G N V H K G R W H G D I 364
225 --- H A T L D N E I Q S L A E W H I P Y G S L E I --- R D I V R Q S R Q G T Y R G R W H G D V 268
285 --- S --- E D I H S K L D E W K I N Y D D I E F --- N Q C L K R K N T A I Y R G R W H G D V 325
315 --- S G D S D S I C N K L Q E W K I N Y S D L E F --- G Q R L K Q G K N T T I Y R G R W H G D V 358
210 --- D D Q F E E L K E S L K E W L V L C D L K F --- G D R L K T G Y K G S I Y K G R W H G E V 253
362 --- R L S R T D L R E A L D C S I A Y S D L Q F --- G D C I R V G R R H K I H R G K W H G Q V 405
301 --- R R E S F V R R E G L S E W T I P H K D L K Y --- G R C I E A G R T S A T Y R G R W H G E V 344
300 --- Y --- E A Q K E G L S E W T I P H A N L K Y --- G R C I E K G K L G S T Y K G H W H G E V 340
298 --- Y --- E A Q K E G L S E W T I P H E N L K Y --- G R C I E K G L G S T Y K G H W H G E V 338
382 --- R D P K A V L R E S L G E C T I P Y G D L R F --- G E R V R V G R N R A I Y K G H W H G E V 425
100 --- D R F G L R G K S L K D F S I D F K D L N L --- G E L N R Q G R R C L Y K G R W H G D V 143
372 --- K S E D H S A K E A V K E W A I P H E N L K Y --- G K C L R A G R N S T Y S G N W H G E V 415
395 --- K S E D F Q L R E S L G E F S I S F A D L E F --- K E C V R V G R R R E V Y R G Q W H G D V 438
480 --- G G V D H R I E A V K E W S I P H E N L K Y --- G C I C L R A G R N G S T Y R G N W H G E V 523
284 --- N S E D S V R E A V R E W S I P F E N L K F --- G K C I R R G T Y S T E Y R Q W H G D V 327
24 --- E S S A I S A R E R L K E W T I S Y S D F K F --- G D C I R K G R D R A L Y R G H W H G E V 67
  
```



|                                              |                                                           |      |
|----------------------------------------------|-----------------------------------------------------------|------|
| BRAF-Capitella-teleta/1-419                  |                                                           |      |
| BRAF-Priapulul-caudatus/1-368                |                                                           |      |
| CRAF-Homo-sapiens/1-648                      |                                                           |      |
| 373                                          | AVKILKVVVD--PTPEQFQAFKNE-VAVLRKTRHVNILLFMGYMTK-----DN--   | 416  |
| ARAF-Homo-sapiens/1-606                      |                                                           |      |
| 334                                          | AVKVLKVSQ--PTAEQAQAFKNE-MQVLRKTRHVNILLFMGFMTIR-----PG--   | 377  |
| RAF-Caenorhabditis-elegans/1-813             |                                                           |      |
| 505                                          | AIKKLNVD--PTPSQMAAFKNE-VAVLRKTRHVNILLFMGWVRE-----PE--     | 548  |
| Raf-Rhipicephalus-sanguineus/1-803           |                                                           |      |
| 516                                          | ALKKLNVTN--PTPAQLQAFKNE-VSVLRKTRHVSILLFMGCYSK-----PQ--    | 559  |
| BRAF-Limulus-caudatus/1-781                  |                                                           |      |
| 500                                          | ALKKLNVD--PTAAQLQAFKNE-VAVLRKTRHVNILLFMGWVSK-----PH--     | 543  |
| RAF-Ramazzottius-variornatus/1-885           |                                                           |      |
| 587                                          | AIKRLNVND--PTLEQMAAFKNE-VAVLRKTRHVNILLFMGCYSKCEPQGSQ--    | 636  |
| RAF-Schmidtea-mediterranea/1-737             |                                                           |      |
| 444                                          | AIKELNVSE--PTPLQLKAFKNE-VSMLRKTRHVNILLFMGCIVY-----PR--    | 487  |
| RAF-Amphimedon-queenslandica/1-904           |                                                           |      |
| 615                                          | AVKRLNVSN--PTEQMQAFKNE-VAVLMKTRHANILLFMGWTISK-----PR--    | 658  |
| RAF-Clytia-hemispherica/1-792                |                                                           |      |
| 501                                          | AVKTLNVKD--PNPQLLAFQNE-VGLVRKTRHVNILLFMGCLSS-----PN--     | 544  |
| BRAF-Crassostrea-gigas/1-688                 |                                                           |      |
| 400                                          | AIKRLNVTA--PTPQLRAFKNE-VAVLRKTRHTNILLFMGWTISK-----PQ--    | 443  |
| RAF-Nematostella-vectensis/1-730             |                                                           |      |
| 442                                          | AIKTLNVTD--PTPTQLQAFKNE-VAVLRKTRHVNILLFMGCMSSK-----PK--   | 485  |
| RAF-Acropora-millepora/1-729                 |                                                           |      |
| 439                                          | AIKTLNVSE--PSPQLQGFKNE-VAVLRKTRHVNILLFMGCMAK-----PE--     | 482  |
| BRAF-Homo-sapiens/1-766                      |                                                           |      |
| 481                                          | AVKMLNVTA--PTPQLQAFKNE-VGLVRKTRHVNILLFMGYSTK-----PQ--     | 524  |
| BRAF-Danio-erio/1-777                        |                                                           |      |
| 491                                          | AVKMLNVTA--PTPQLQAFKNE-VGLVRKTRHVNILLFMGYTISK-----PQ--    | 534  |
| BRAF-Eucidaris-tribuloides-partial/1-725     |                                                           |      |
| 433                                          | AVKMLNVTD--PTPSQLQAFKNE-VAVLRKTRHANVLLFMGCASK-----PQ--    | 476  |
| BRAF-Strongylocentrotus-purpuratus/1-803     |                                                           |      |
| 517                                          | AVKRLNVKD--PTPSQLQAFKNE-VAVLRKTRHANVLLFMGCTSK-----PQ--    | 560  |
| BRAF-Paracentrotus-lividus-RNAseq/1-746      |                                                           |      |
| 460                                          | AVKRLNVKD--PTPSQLQAFKNE-VAVLRKTRHANVLLFMGCTSK-----PQ--    | 503  |
| BRAF-Paracentrotus-lividus-contigEST/1-716   |                                                           |      |
| 430                                          | AVKRLNVKD--PTPSQLQAFKNE-VAVLRKTRHANVLLFMGCTSK-----PQ--    | 473  |
| BRAF-Saccoglossus-kowaleskii/1-733           |                                                           |      |
| 445                                          | AVKRLNVTD--PTPSQLQAFKNE-VAVLRKTRHANVLLFMGCTSK-----PE--    | 488  |
| RAF-Parastichopus-parvimensis/1-747          |                                                           |      |
| 457                                          | AIKRLNVKD--PTPSQLQAFKNE-VAVLRKTRHANVLLFMGCTSK-----PE--    | 500  |
| BRAF-Branchiostoma-floridae/1-831            |                                                           |      |
| 542                                          | AVKRLNVKD--PSPAQLQAFKNE-VAVLRKTRHVNILLFMGCYSK-----NQ--    | 585  |
| BRAF-Trichoplax-adherens-partial/1-325       |                                                           |      |
| 36                                           | AIKRLNVTD--PTPSQLQAFKNE-VTVLRKTRHVNILLFMGVMSK-----PF--    | 79   |
| BRAF-Patiria-miniata-partial/1-819           |                                                           |      |
| 531                                          | AVKRLNVTD--PTASQLQAFKNE-VAVLRKTRHANVLLFMGCTSK-----PQ--    | 574  |
| KSR1-Caenorhabditis-elegans/1-771            |                                                           |      |
| 501                                          | AVKVTMEHISDA-SKKAEEFKLE-VSAYKNTRHNDIALFLGYFMS-----DG--    | 546  |
| KSR2-Caenorhabditis-elegans/1-550            |                                                           |      |
| 272                                          | AVRFVNMNLSQE-DRRADVFATIEVSAYKNSRHDHIALFYGYVSD-----PVTN    | 320  |
| KSR1-Amphimedon-queenslandica/1-1246         |                                                           |      |
| 963                                          | AVKRFVLPN--ATPKQINKFRFE-VAVLRKIRHENLALFMGVCLT-----TP--    | 1006 |
| KSR1-Patiria-miniata/1-787                   |                                                           |      |
| KSR1-Anneissia-japonica/1-885                |                                                           |      |
| 618                                          | AVRKLDTDS--NNEEERQAFKKE-VLQLKTRRHVDVLLFMGCTCKM-----AD--   | 661  |
| KSR1-Parastichopus-parvimensis/1-879         |                                                           |      |
| 611                                          | AIKILNIDE--EDKEQLKAFKRE-VQFKKTRHENVVLFMGACMH-----LP--     | 654  |
| KSR1-Eucidaris-tribuloides/1-873             |                                                           |      |
| 605                                          | AIKMLNIDF--NDEKQLKAFKRE-VSIFRKTRHDYVLLFMGACMR-----PP--    | 648  |
| KSR1-Strongylocentrotus-purpuratus/1-869     |                                                           |      |
| 601                                          | AIKMLNIDT--DDEKQLKAFKRE-VSYFRKTRHDFVLLFMGACMR-----PP--    | 644  |
| KSR1-Paracentrotus-lividus/1-848             |                                                           |      |
| 580                                          | AIKMLNIDT--DDEKQLKAFKRE-VSFFRMTRHDFVLLFMGACMR-----PP--    | 623  |
| KSR1-Trichoplax-adherens/1-966               |                                                           |      |
| 705                                          | AIKFNVSR--LTEEAIESFKLE-VATFRKTRHDNLLVFMGACMK-----PP--     | 748  |
| KSR1-Schmidtea-mediterranea/1-954            |                                                           |      |
| 681                                          | AVKIMNIDPQ-DENDACMAAFKSE-VGALHKTRHENLVLFMGACME-----PP--   | 726  |
| KSR1-Priapulul-caudatus-partial/1-248        |                                                           |      |
| KSR1-Clytia-hemispherica/1-881               |                                                           |      |
| 606                                          | ALKVLYLEN--PTTEEKNDFKYK-VQVLRKTRHENLVLFMGACME-----PA--    | 649  |
| KSR1-Nematostella-vectensis-partial/1-917    |                                                           |      |
| 650                                          | AVKMIENDN--PTEEQLNKAFKFE-VTFVRKTRHDNTVLLFMGACMD-----PP--  | 693  |
| KSR1-Acropora-millepora/1-957                |                                                           |      |
| 689                                          | AVKILNIDEN--PTEEQLNKAFKFE-VGTFVRKTRHENVLLFMGACMD-----PP-- | 732  |
| KSR1-Drosophila-melanogaster/1-966           |                                                           |      |
| 703                                          | AVKLLNEDYL--QDEHMLLAFKFE-VANFKNTRHENLVLFMGACMN-----PP--   | 747  |
| KSR1-Crassostrea-gigas/1-859                 |                                                           |      |
| 589                                          | AIKMLHMDPDSDNNAQLSAFKLE-VAMLKNTRHENLVLFMGACMK-----PP--    | 635  |
| KSR1-Saccoglossus-kowalevskii/1-898          |                                                           |      |
| 629                                          | AIKQFNIDT--DNELQLHSFKFE-VQTFVRKTRHENVLLFMGACMN-----PP--   | 672  |
| KSR1-Branchiostoma-floridae/1-865            |                                                           |      |
| 599                                          | AIKVFNIET--DNDLQLASFKTE-VSMFRKTRHENLVLFMGACMK-----LP--    | 642  |
| KSR1-Capitella-teleta/1-536                  |                                                           |      |
| 270                                          | AIKMLTVDSQQTQDTSQLQAFKRE-IAMLRKTRHENLVLFMGACMN-----PM--   | 316  |
| KSR1-Rhipicephalus-sanguineus/1-864          |                                                           |      |
| 597                                          | AVKMLNMDHI--DDRKTLETFKQE-VATFRKTRHENLVLFMGACMK-----PP--   | 641  |
| KSR1-Limulus-polyphemus/1-603                |                                                           |      |
| 336                                          | AIKMLNMDM--DDDKTLETFKQE-VANFRKTRHENLVLFMGACMK-----PP--    | 380  |
| KSR3-Ramazzottius-variornatus-partial/1-451  |                                                           |      |
| 177                                          | LIYKHN-----AENSVEFLAD-VENMSKIRHENIILLFLGATVD-----NE--     | 216  |
| KSR2-Homo-sapiens/1-950                      |                                                           |      |
| 690                                          | AIRLIDIER--DNEDQLKAFKRE-VMAYRQTRHENVLLFMGACMS-----PP--    | 733  |
| KSR2-Danio-erio/1-966                        |                                                           |      |
| 703                                          | AIRLIDIER--DNEDQLKAFKRE-VMAYRNTRHENVLLFMGACMR-----PP--    | 746  |
| KSR1-Homo-sapiens/1-923                      |                                                           |      |
| 637                                          | AIRLLEMDG--HNQDHLKLFKKE-VMNYRQTRHENVLLFMGACMN-----PP--    | 680  |
| KSR1-Danio-erio/1-898                        |                                                           |      |
| 636                                          | AIRLLEIDG--NNQDHLKLFKKE-VMNYRQTRHENVLLFMGACMA-----PP--    | 679  |
| KSR3-Clytia-hemispherica/1-517               |                                                           |      |
| 227                                          | MVYMFEN--N--LDHDESRWFEN-VSLLGLIRHENVLLFMGACSI-----PP--    | 268  |
| KSR3-Schmidtea-mediterranea/1-666            |                                                           |      |
| 401                                          | SVFMFE--N--LDHDESRWFEN-VSNLTMIRHENIVLFMGACSI-----PP--     | 442  |
| KSR3-Rhipicephalus-sanguineus/1-675          |                                                           |      |
| 409                                          | LIYTFR--H--TKEQDVTRFWE-VGKLSMIRHENIALFMGACAE-----PP--     | 450  |
| KSR3-Limulus-polyphemus/1-686                |                                                           |      |
| 420                                          | LIYTVR--Q--QKEAERQFLDD-VRQLSMIRHENVLLFMGACIE-----PP--     | 461  |
| KSR3-Limulus-polyphemus-isoformB/1-671       |                                                           |      |
| 409                                          | LIYTVR--Q--QRQTELCQFLDD-VTQLSMIRHENVLLFMGACID-----PP--    | 450  |
| KSR3-Lingula-anatina/1-626                   |                                                           |      |
| 368                                          | LIHKYD--P--S--VEDVFWTK-ISMLRMIIRHENIALFMGACAE-----PP--    | 406  |
| KSR3-Crassostrea-gigas/1-585                 |                                                           |      |
| 322                                          | NIHDFH--A--E--SDTSDFWNK-VRKLCRIRHENLVLFMGACLE-----EC--    | 361  |
| KSR3-Nematostella-vectensis/1-640            |                                                           |      |
| 364                                          | MIHTVK--K--SSKIDLEEFKLE-VSLLSMIRHENVLLFMGACLE-----PP--    | 405  |
| KSR3-Acropora-millepora/1-634                |                                                           |      |
| 365                                          | MIHTRR--R--STKKDVEFLKLE-VSVLSMIRHENVLLFMGACLE-----PP--    | 406  |
| KSR3-Priapulul-caudatus/1-533                |                                                           |      |
| 269                                          | MVHAFQ--S--SQLDVDRFWE-VKVLSMIRHENVALFMGACVE-----PP--      | 310  |
| KSR3-Saccoglossus-kowaleskii/1-591           |                                                           |      |
| 326                                          | VIHTYH--S--S--RDVNEFLEE-VAI LSRIIRHENIELFMGVSTE-----PS--  | 365  |
| KSR3-Ptychodera-flava/1-629                  |                                                           |      |
| 359                                          | IHTYQ--A--T--RNFLEE--VAVLSRIIRHENIELFMGVSLF-----PT--      | 398  |
| KSR3-Trichoplax-adherens/1-510               |                                                           |      |
| 254                                          | MHTR E--N--LNKKEISDLWQE-VSILSMIRHDNISLFMGACLE-----PP--    | 295  |
| KSR3-Capitella-teleta/1-642                  |                                                           |      |
| 406                                          | MIHTYQ--D--RKEEIVTEFLGE-VSRMSILIRHENIALFMGACLE-----EP--   | 447  |
| KSR3-Eucidaris-tribuloides/1-545             |                                                           |      |
| 345                                          | LHSRH--N--VAHLDEFLEE-VSMLSMIRHENIALFVGACVE-----PN--       | 384  |
| KSR3-Strongylocentrotus-purpuratus/1-602     |                                                           |      |
| 341                                          | LITRY--S--K--STDINDFLDE-VAMLSKIRHENIALFMGACVE-----PG--    | 381  |
| KSR3-Paracentrotus-lividus-RNAseq/1-600      |                                                           |      |
| 339                                          | LITRN--A--K--STDINDFLDE-VAMLSKIRHENIALFMGACVE-----PG--    | 379  |
| KSR3-Notospermus-geniculatus/1-691           |                                                           |      |
| 426                                          | MHAYE--G--I EEDQVAFWE--IAKLSMIRHENIALFMGACIE-----PP--     | 467  |
| KSR3-Aplysia-californica/1-405               |                                                           |      |
| 144                                          | IHVFE--E--LRQKDKDAFWNE-LGKLCRIRHENIILLFMAACTS-----QP--    | 185  |
| KSR3-Amphiura-filliformis-partial/1-642      |                                                           |      |
| 416                                          | LHTRN--D--V--HDLEEFLEE-VSLLSMIRHENIALFMGACID-----RP--     | 455  |
| KSR3-Platynereis-dumerilii/1-704             |                                                           |      |
| 439                                          | MHIVK--G--IEEEVARFWE--VSKLSMIRHENVALFMGACIE-----HP--      | 480  |
| KSR3-Patiria-miniata/1-779                   |                                                           |      |
| 524                                          | LHTRL--H--V--EDVDAFLE--VSKLSMIRHENIALFMGACID-----PP--     | 563  |
| KSR3-Anneissia-japonica/1-590                |                                                           |      |
| 328                                          | IHTRD--V--Q--E EEDFLEE--VSMLSMIRHENIALFMGACID-----AP--    | 366  |
| KSR3-Parastichopus-parvimensis-partial/1-330 |                                                           |      |
| 68                                           | LHTRT--N--A--ENLEHFLDE-VAMLSMVIRHENVALFMGACID-----EP--    | 107  |







|                                              |                                                   |                            |
|----------------------------------------------|---------------------------------------------------|----------------------------|
| BRAF-Capitella-teleta/1-419                  |                                                   |                            |
| BRAF-Priapulul-caudatus/1-368                |                                                   |                            |
| CRAF-Homo-sapiens/1-648                      |                                                   |                            |
| 465                                          | IHR-DMKSNIFLHE--GL-TVKIGDFGLATVKSRWSG----         | SQ-Q-V EQPTGS- 508         |
| 426                                          | IHR-DLKSNNIFLHE--GL-TVKIGDFGLATVKTRWSG----        | AQ-P-LEQPSGS- 469          |
| ARAF-Homo-sapiens/1-606                      |                                                   |                            |
| 599                                          | IHR-DLKTNNIFLMD--DMSTVKIGDFGLATVKTKWTV----        | NGGQQQQPTGS- 645           |
| RAF-Caenorhabditis-elegans/1-813             |                                                   |                            |
| 608                                          | IHR-DLKSNNIFLHD--DL-TVKIGDFGLATVKARWSG----        | SQ-P-FSQPTGS- 651          |
| Raf-Rhipicephalus-sanguineus/1-803           |                                                   |                            |
| 592                                          | IHR-DLKSNNIFLHE--DW-TVKIGDFGLATVKTRWSG----        | S-E-Q-FNQPTGS- 635         |
| BRAF-Limulus-caudatus/1-781                  |                                                   |                            |
| 685                                          | IHR-DLKSNNIFLSE--EC-SVKIGDFGLATVKTRWTG----        | SH-QQ-SRQTTGS- 729         |
| RAF-Ramazottius-variornatus/1-885            |                                                   |                            |
| 536                                          | IHR-DLKSNNIFLHE--K-TIKIGDFGLATVKSTWSN----         | S-G-FQQPTGS- 577           |
| RAF-Schmidtea-mediterranea/1-737             |                                                   |                            |
| 707                                          | IHR-DLKSNNIFLHD--DM-TVKIGDFGLATVKTRWDG----        | NE-K-VRQPTGS- 750          |
| RAF-Clytia-hemispherica/1-792                |                                                   |                            |
| 593                                          | IHR-DLKSNNIFLQD--DL-TVKIGDFGLATVKTRWSG----        | DH-G-CEQPSTGS- 636         |
| BRAF-Crassostrea-gigas/1-688                 |                                                   |                            |
| 492                                          | IHR-DLKSNNIFLFE--NL-TVKIGDFGLATMKTRWSG----        | SH-Q-FQQPTGS- 535          |
| RAF-Nematostella-vectensis/1-730             |                                                   |                            |
| 534                                          | IHR-DLKSNNIFLQE--DL-TVKIGDFGLATIKTRWSG----        | SQ-Y-S EQPSTGS- 577        |
| RAF-Acropora-millepora/1-729                 |                                                   |                            |
| 531                                          | IHR-DLKSNNIFLQE--DL-TVKIGDFGLATIKSRWSG----        | SH-Q-FEQPSTGS- 574         |
| BRAF-Homo-sapiens/1-766                      |                                                   |                            |
| 573                                          | IHR-DLKSNNIFLHE--DL-TVKIGDFGLATVKSRWSG----        | SH-Q-FEQPSTGS- 616         |
| BRAF-Danio-erio/1-777                        |                                                   |                            |
| 583                                          | IHR-DLKSNNIFLHE--DL-TVKIGDFGLATVKSRWSG----        | SH-Q-FEQPSTGS- 626         |
| BRAF-Eucidaris-tribuloides-partial/1-725     |                                                   |                            |
| 525                                          | IHR-DLKSNNIFLHE--DL-TVKIGDFGLATVKSRWSG----        | SH-Q-FEQPSTGS- 568         |
| BRAF-Strongylocentrotus-purpuratus/1-803     |                                                   |                            |
| 609                                          | IHR-DLKSNNIFLHD--DL-TVKIGDFGLATVKSRWSG----        | SQ-Q-FEQPSTGS- 652         |
| BRAF-Paracentrotus-lividus-RNAseq/1-746      |                                                   |                            |
| 552                                          | IHR-DLKSNNIFLHD--DL-TVKIGDFGLATVKSRWSG----        | SQ-Q-FEQPSTGS- 595         |
| BRAF-Paracentrotus-lividus-contigEST/1-716   |                                                   |                            |
| 522                                          | IHR-DLKSNNIFLHD--DL-TVKIGDFGLATVKSRWSG----        | SQ-Q-FEQPSTGS- 565         |
| BRAF-Saccoglossus-kowaleskii/1-733           |                                                   |                            |
| 537                                          | IHR-DLKSNNIFLHD--DM-TVKIGDFGLATVKSRWSG----        | S-E-R-MEQPTGS- 580         |
| RAF-Parastichopus-parvimensis/1-747          |                                                   |                            |
| 549                                          | IHR-DLKSNNIFLHE--DF-TVKIGDFGLATVKSRWSG----        | SQ-Q-FEQPSTGS- 592         |
| BRAF-Branchiostoma-floridae/1-831            |                                                   |                            |
| 634                                          | IHR-DMKSNIFLFE--DM-TVKIGDFGLATVKSRWSG----         | SH-N-FEQPSTGS- 677         |
| BRAF-Trichoplax-adherens-partial/1-325       |                                                   |                            |
| 128                                          | IHR-DLKSNNIFLHD--DL-TVKIGDFGLATVKSRWST----        | CQ-D-S EQPSTGS- 171        |
| BRAF-Patiria-miniata-partial/1-819           |                                                   |                            |
| 623                                          | IHR-DMKSNIFLHD--DL-TVKIGDFGLATVKSRWSG----         | SQ-L-CEQPTGS- 666          |
| KSR1-Caenorhabditis-elegans/1-771            |                                                   |                            |
| 597                                          | LHK-DLRSKNIFLES--KN-KVVIITDFGLISMKR LAHP----      | KQK-SGYLTSKFW- 642         |
| KSR2-Caenorhabditis-elegans/1-550            |                                                   |                            |
| 371                                          | LHR-DLRTKNILLDN--PN-RVVVITDFALMKLERLENP----       | RRN-CTLLIPNHW- 416         |
| KSR1-Amphimedon-queenslandica/1-1246         |                                                   |                            |
| 1056                                         | IHK-GLNTKNIFLEKRDQKE--KVIITDMGLSSLSLLYDNTTSKG--   | GVVTFPRAQ- 1107            |
| BRAF-Patiria-miniata/1-787                   |                                                   |                            |
| 611                                          | IHK-DLKSNNIFLENG--KVVITDFALFSIMR LSR--ENRRP-NVMVI | DGWF- 656                  |
| KSR1-Anneissia-japonica/1-885                |                                                   |                            |
| 711                                          | IHK-DLRSKNIFVEKGL-SN-KVVIADYSIFSVARLSK--ENKRE     | DC LQIPKNW- 759            |
| KSR1-Parastichopus-parvimensis/1-879         |                                                   |                            |
| 704                                          | VHK-DLKSKNIFILENG--KVVITDFALFSLARLSR--ENRKG       | DVVVIPDGW- 749             |
| KSR1-Eucidaris-tribuloides/1-873             |                                                   |                            |
| 698                                          | IHK-DLKSKNIFILENG--KVVITDFALFSIGRLSK--QKIRK       | DTLLIPDGW- 743             |
| KSR1-Strongylocentrotus-purpuratus/1-869     |                                                   |                            |
| 694                                          | VHK-DLKSKNIFILENG--KVVITDFALFSIGRLSK--QKTRK       | DSLVPDGW- 739              |
| KSR1-Paracentrotus-lividus/1-848             |                                                   |                            |
| 673                                          | VHK-DLKSKNIFILENG--KVVITDFALFSIGRLSK--KKARK       | DSLVPDGW- 718              |
| KSR1-Trichoplax-adherens/1-966               |                                                   |                            |
| 798                                          | IHK-DLKSNNIFIEK--C-RIVITDFGVSSLDVYNTPTQERNL       | DCWVIRDY- 845              |
| 776                                          | LHK-DLKSNNIFIES--NS-KVVISDFGLDFV RMCK--QAI        | S G-SYLRIPPGW- 822         |
| KSR1-Priapulul-caudatus-partial/1-248        |                                                   |                            |
| 699                                          | VHX-DLKTKNVFL EHN--QN-RVVIITDFGLIS IADV KV--      | TNTRK-NHLM LPKGW- 746      |
| KSR1-Clytia-hemispherica/1-881               |                                                   |                            |
| 743                                          | VHT-DLRSKNVFL EEL--NS-KAVITDFGLYSVAGLTA--R        | SARP-GYLMV P YGW- 789      |
| KSR1-Acropora-millepora/1-957                |                                                   |                            |
| 782                                          | VHT-DLRSKNVFL EES--AN-RVVIITDFGLFSVAGLTT--        | KSARP-GWLLIPEGW- 828       |
| KSR1-Drosophila-melanogaster/1-966           |                                                   |                            |
| 797                                          | IHK-DLRTKNIFILEN--G-KVVIITDFGLFSSTKLLYC--         | D-MGLGVPHNW- 839           |
| KSR1-Crassostrea-gigas/1-859                 |                                                   |                            |
| 686                                          | IHK-DLKTKNIFILEN--G-KVVIITDFGLFSVTKICH--          | GNRKG-DWLHISP GW- 731      |
| KSR1-Saccoglossus-kowaleskii/1-898           |                                                   |                            |
| 722                                          | VHK-DLKSNNIFILEN--RD-KAVITDFGLFSVTKLCE--          | ADRR-NCIRIPEGW- 768        |
| KSR1-Branchiostoma-floridae/1-865            |                                                   |                            |
| 692                                          | LHK-DLKSNNIFILEN--G-KVVIITDFGLFSVTKLIQY--         | GERKD-DT LAIPGW- 738       |
| KSR1-Capitella-teleta/1-536                  |                                                   |                            |
| 366                                          | VHK-DLKSNNIFILEN--G-KVVIITDFGLFNVTKLCH--          | GNRKG-EWLSIPPGW- 411       |
| KSR1-Rhipicephalus-sanguineus/1-864          |                                                   |                            |
| 691                                          | VHK-DLKTKNIFYEN--G-KVVIITDFGLFSVTKLCC--           | GNRKG-DWLTIPQGW- 736       |
| KSR1-Limulus-polyphemus/1-603                |                                                   |                            |
| 430                                          | LHK-DLKTKNIFYEN--G-KVVIITDFGLFSVTKLCC--           | GNRKG-DWLTIPQGW- 475       |
| KSR3-Ramazottius-variornatus-partial/1-451   |                                                   |                            |
| 270                                          | QVGTSLHTGNVFL ESE--KI-KLSLLDFGVGP--               | ADMFSRGNSSRNHL 312         |
| KSR2-Homo-sapiens/1-950                      |                                                   |                            |
| 783                                          | LHK-DLKSNNIFYDN--G-KVVIITDFGLFSISGV LQA--         | GR-RE-DKLRIQNGW- 828       |
| KSR2-Danio-erio/1-966                        |                                                   |                            |
| 796                                          | LHK-DMKSNVFL EES--G-KVVIITDFGLFTISGV LQA--        | GSRRK-DKLRIPSGW- 842       |
| KSR1-Homo-sapiens/1-923                      |                                                   |                            |
| 730                                          | VHK-DLKSNNIFYDN--G-KVVIITDFGLFGISGVVRE--          | GR-RE-NQLKLSHDW- 775       |
| KSR1-Danio-erio/1-898                        |                                                   |                            |
| 729                                          | VHK-DLKSNNIFYDHT--N-KVVIITDFGLFGISGVVQE--         | GR-RE-NELKLP HGW- 774      |
| KSR3-Clytia-hemispherica/1-517               |                                                   |                            |
| 318                                          | TLG-KLRSKNVFL EEA--KV-KIGIT EYTT--                | TQPTVKS-GCGFLPDGH- 359     |
| KSR3-Schmidtea-mediterranea/1-666            |                                                   |                            |
| 494                                          | I VR-RLNSRNIVLEP--KV-VLSLLDCSHLD--                | YD-EIDTL-DNVCIPGH- 536     |
| KSR3-Rhipicephalus-sanguineus/1-675          |                                                   |                            |
| 500                                          | VHK-SLTSKNVFL EES--RV-KLCLMDQGLA--                | ER-VHDP-SDRGCLARGH- 541    |
| KSR3-Limulus-polyphemus/1-686                |                                                   |                            |
| 511                                          | IHK-KLNSRNIVLEES--RV-KLCLMDQGMS--                 | DS-QLDRA-EYGCVP RGH- 552   |
| KSR3-Limulus-polyphemus-isoformB/1-671       |                                                   |                            |
| 500                                          | IHK-KLNSRNIVLEES--RV-KLCLMDQGMP--                 | DS-RDRA-EYGCVP RGH- 541    |
| KSR3-Lingula-anatina/1-626                   |                                                   |                            |
| 457                                          | VLE-RLNSRNIVLEES--KV-KIFVLDHFSFS--                | EN-RLERS-DCACLPRGR- 498    |
| KSR3-Crassostrea-gigas/1-585                 |                                                   |                            |
| 411                                          | VHK-RLTSRNIVFLCP--NV-RISVVDYGLA--                 | EV-KYDRP-GFACLPRGD- 452    |
| KSR3-Nematostella-vectensis/1-640            |                                                   |                            |
| 455                                          | I LP-RLNSRNIVFL EES--KV-KLCVGTGYTGR--             | K-LIERH-GYASLP RGH- 495    |
| KSR3-Acropora-millepora/1-634                |                                                   |                            |
| 456                                          | VLP-AL TAMNIVFL EES--KV-KLCVSGYCNR--              | TT-RVERE-GYASLP QGH- 497   |
| KSR3-Priapulul-caudatus/1-533                |                                                   |                            |
| 360                                          | V LK-RLNSRNIVLEP--KV-KLCVVDYCAMM--                | EK-TIERA-NYGS LPQGH- 401   |
| KSR3-Saccoglossus-kowaleskii/1-591           |                                                   |                            |
| 415                                          | T VGSKNLNSRNIVFL EES--KV-KICLLGDFV--              | EV-QNTRD-DIACLPSGY- 457    |
| KSR3-Ptychodera-flava/1-629                  |                                                   |                            |
| 448                                          | HVGSKNLNSRNIVFMEES--KV-KLCLLDGFDVV--              | EQ-HHIRD-DVVCIPKGH- 490    |
| KSR3-Trichoplax-adherens/1-510               |                                                   |                            |
| 345                                          | VHT-KLCSRNIVFL EES--KV-KISITDYS TYN--             | GT-SYRSE-NTSII PHGH- 387   |
| KSR3-Capitella-teleta/1-642                  |                                                   |                            |
| 497                                          | V LK-KLNSRNIVLEP--KV-KICLDYGMV--                  | EA-KYDRP-DYGCVSRGA- 538    |
| KSR3-Eucidaris-tribuloides/1-545             |                                                   |                            |
| 434                                          | I FG-HLNSKCI FLES--KV-KLSMTRIDT--                 | DA-SCHRS-GYACLPRGG- 475    |
| KSR3-Strongylocentrotus-purpuratus/1-602     |                                                   |                            |
| 431                                          | I VG-HLSRKNIVFL EES--KV-KLSVTRVDT S--             | DV-TCQRA-SHACLPRGK- 472    |
| KSR3-Paracentrotus-lividus-RNAseq/1-600      |                                                   |                            |
| 429                                          | I VG-HLTSRCVYLES--KV-KLSVTCVDT S--                | DV-TCQRT-NHASLP R G K- 470 |
| KSR3-Notospermus-geniculatus/1-691           |                                                   |                            |
| 517                                          | IMQ-TLNSRNIVFL EES--KV-KICLMDY GMA--              | ES-KNDRE-DCGCI PRGH- 558   |
| KSR3-Aplysia-californica/1-405               |                                                   |                            |
| 235                                          | V LR-KLNTKNVFI GH--KV-KVSAMDFGFP--                | DS-KHRA-NYGS LP RGH- 276   |
| KSR3-Amphiura-filiformis-partial/1-642       |                                                   |                            |
| 505                                          | V VG-HLNSRAVFL EES--KV-KLCMTGYDTDP--              | IA-TCESE-DYASLP QGH- 548   |
| KSR3-Platynereis-dumerilii/1-704             |                                                   |                            |
| 530                                          | V LC-KLNSRNIVLEP--KV-KVSLMDY GMS--                | EK-KFDRP-GYGCVP RGH- 571   |
| KSR3-Patiria-miniata/1-779                   |                                                   |                            |
| 608                                          | V VG-DLNTKAI FLES--KV-KLCLTGFDYDT--               | DG-MCDRE-DYASLP QGH- 649   |
| KSR3-Anneissia-japonica/1-590                |                                                   |                            |
| 418                                          | V VG-CLNSRNIVLEES--KV-KVCMTGHE TV--               | DS-PCSI G-THACL PKGH- 459  |
| KSR3-Parastichopus-parvimensis-partial/1-330 |                                                   |                            |
| 157                                          | MV P-HLSRRTVFL EEA--KV-KIDMMGDAHCL--              | TD-EYERP-NYACLQKGE- 199    |













|                                              |                                                                                       |                                                                             |      |
|----------------------------------------------|---------------------------------------------------------------------------------------|-----------------------------------------------------------------------------|------|
| BRAF-Capitella-teleta/1-419                  | -----                                                                                 |                                                                             |      |
| BRAF-Priapulul-caudatus/1-368                | -----                                                                                 |                                                                             |      |
| CRAF-Homo-sapiens/1-648                      | 636 AC-----                                                                           | T L T T S P R L P V F                                                       | 648  |
| ARAF-Homo-sapiens/1-606                      | 596 AC-----                                                                           | L L S A A R L V P                                                           | 606  |
| RAF-Caenorhabditis-elegans/1-813             | 772 AVMR SQMLS-WSY I P P A T A K T P Q S A A A A A A -R N K K A Y Y N V -Y G L I      |                                                                             | 813  |
| Raf-Rhipicephalus-sanguineus/1-803           | 776 ---- ED----                                                                       | F L - Y V C A S P K T P S Q F ----                                          | 803  |
| BRAF-Limulus-caudatus/1-781                  | 760 ---- ED----                                                                       | F T - Y I C A S P K T P S Q F ----                                          | 781  |
| RAF-Ramazottius-variornatus/1-885            | 855 ---- ED----                                                                       | F T A F T C A S P K T P A N V H T T N Y T S A F - P F S G G                 | 885  |
| RAF-Schmidtea-mediterranea/1-737             | 702 ---- T D E V D -R N D Y M N V S P N T P I S T D K -- F F F P S -P N K L N N Q G S |                                                                             | 737  |
| RAF-Amphimedon-queenslandica/1-904           | 876 ---- Q E ----                                                                     | E L -- - N K S P H T P S H N S S -- A T G A E S A F H L V K Q               | 904  |
| RAF-Clytia-hemispherica/1-792                | 761 ---- D V ----                                                                     | E I A Y P C P T P H T P I Q G Q D -- V - F -- S F L S G Q P Q P V Y         | 792  |
| BRAF-Crassostrea-gigas/1-688                 | 658 ---- ED----                                                                       | F M - Y L C A S P K T P I N S G I -- H - F L F - T S T S G G - G L N        | 688  |
| RAF-Nematostella-vectensis/1-730             | 702 ---- D D ----                                                                     | V F - F G P S V P E T P I S P -- F - G G G F S F F S G G C Y                | 730  |
| RAF-Acropora-millepora/1-729                 | 700 ---- S E ----                                                                     | V G F F - G A P P E T P I S P -- F - G N Y Q P F F T A V A G Y              | 729  |
| BRAF-Homo-sapiens/1-766                      | 741 ---- ED----                                                                       | F S L Y A C A S P K T P I Q A G G - Y - G A F - P V H                       | 766  |
| BRAF-Danio-erio/1-777                        | 751 ---- ED----                                                                       | F S L Y T C A S P K T P I Q A G G - Y - G E F - T A F K                     | 777  |
| BRAF-Eucidaris-tribuloides-partial/1-725     | 693 ---- D E ----                                                                     | F M - Y - C P S P K T P I Q S - Q -- F - G V F - P F F A V G N I R S D I H  | 725  |
| BRAF-Strongylocentrotus-purpuratus/1-803     | 778 ---- D D ----                                                                     | F M - Y - C P S P K T P I Q S - Q -- F - A V F - P F D M R G                | 803  |
| BRAF-Paracentrotus-lividus-RNAseq/1-746      | 721 ---- D D ----                                                                     | F M - Y - C P S P K T P I Q S - Q -- F - A V F - P F D M R Q                | 746  |
| BRAF-Paracentrotus-lividus-contigEST/1-716   | 691 ---- D D ----                                                                     | F M - Y - C P S P K T P I Q S - Q -- F - A V F - P F D M R Q                | 716  |
| BRAF-Saccoglossus-kowaleskii/1-733           | 706 ---- ED----                                                                       | F L - Y Y C P S P K T P L Q S - Q -- F - P A F - G F G Y P N L              | 733  |
| RAF-Parastichopus-parvimensis/1-747          | 717 ---- E E ----                                                                     | F M - Y - C P S P R T P I Q S - Q -- F - G A F - P F F T N K E P V V M      | 747  |
| BRAF-Branchiostoma-floridae/1-831            | 802 ---- D D ----                                                                     | F I - Y S C A S P K T P I Q G - Q -- F - A A F - H F F S A V G H R          | 831  |
| BRAF-Trichoplax-adherens-partial/1-325       | 292 ---- D A ----                                                                     | L S - I - V G T P K S P I P S - A - Y - G N F - S F L S N T N T I D S K M T | 325  |
| BRAF-Patiria-miniata-partial/1-819           | 791 ---- D D ----                                                                     | F M - Y - C P S P K T P I N S - Q -- F - G A F - P F F T G T G G L          | 819  |
| KSR1-Caenorhabditis-elegans/1-771            | 771 ----                                                                              | F                                                                           | 771  |
| KSR2-Caenorhabditis-elegans/1-550            | -----                                                                                 |                                                                             |      |
| KSR1-Amphimedon-queenslandica/1-1246         | 1244 ----                                                                             | L H I                                                                       | 1246 |
| KSR1-Patiria-miniata/1-787                   | 787 ----                                                                              | L                                                                           | 787  |
| KSR1-Anneissia-japonica/1-885                | 885 ----                                                                              | F                                                                           | 885  |
| KSR1-Parastichopus-parvimensis/1-879         | 879 ----                                                                              | I                                                                           | 879  |
| KSR1-Eucidaris-tribuloides/1-873             | 873 ----                                                                              | L                                                                           | 873  |
| KSR1-Strongylocentrotus-purpuratus/1-869     | 869 ----                                                                              | L                                                                           | 869  |
| KSR1-Paracentrotus-lividus/1-848             | 848 ----                                                                              | L                                                                           | 848  |
| KSR1-Trichoplax-adherens/1-966               | -----                                                                                 |                                                                             |      |
| KSR1-Schmidtea-mediterranea/1-954            | 953 ----                                                                              | I T                                                                         | 954  |
| KSR1-Priapulul-caudatus-partial/1-248        | -----                                                                                 |                                                                             |      |
| KSR1-Clytia-hemispherica/1-881               | 880 ----                                                                              | L I                                                                         | 881  |
| KSR1-Nematostella-vectensis-partial/1-917    | 917 ----                                                                              | I                                                                           | 917  |
| KSR1-Acropora-millepora/1-957                | 957 ----                                                                              | I                                                                           | 957  |
| KSR1-Drosophila-melanogaster/1-966           | 966 ----                                                                              | F                                                                           | 966  |
| KSR1-Crassostrea-gigas/1-859                 | 857 ----                                                                              | F T A                                                                       | 859  |
| KSR1-Saccoglossus-kowalevskii/1-898          | 898 ----                                                                              | L                                                                           | 898  |
| KSR1-Branchiostoma-floridae/1-865            | 865 ----                                                                              | I                                                                           | 865  |
| KSR1-Capitella-teleta/1-536                  | 536 ----                                                                              | F                                                                           | 536  |
| KSR1-Rhipicephalus-sanguineus/1-864          | 864 ----                                                                              | F                                                                           | 864  |
| KSR1-Limulus-polyphemus/1-603                | 603 ----                                                                              | L                                                                           | 603  |
| KSR3-Ramazottius-variornatus-partial/1-451   | 446 ----                                                                              | F S S F Q M                                                                 | 451  |
| KSR2-Homo-sapiens/1-950                      | -----                                                                                 |                                                                             |      |
| KSR2-Danio-erio/1-966                        | -----                                                                                 |                                                                             |      |
| KSR1-Homo-sapiens/1-923                      | 904 V V P R F E R F G L G V L E - S S N P K M                                         |                                                                             | 923  |
| KSR1-Danio-erio/1-898                        | -----                                                                                 |                                                                             |      |
| KSR3-Clytia-hemispherica/1-517               | 490 I L N H Q N A F R I D A T T P Q H T A Q W R K T S - - - N L - - - - - S - - - -   |                                                                             | 517  |
| KSR3-Schmidtea-mediterranea/1-666            | 662 ----                                                                              | L I C N Y                                                                   | 666  |
| KSR3-Rhipicephalus-sanguineus/1-675          | 667 ----                                                                              | G I G R Q P L C S                                                           | 675  |
| KSR3-Limulus-polyphemus/1-686                | 678 ----                                                                              | S L G R N F C G R                                                           | 686  |
| KSR3-Limulus-polyphemus-isoformB/1-671       | 666 ----                                                                              | - R S F C G R                                                               | 671  |
| KSR3-Lingula-anatina/1-626                   | 623 ----                                                                              | M L G S                                                                     | 626  |
| KSR3-Crassostrea-gigas/1-585                 | 578 ----                                                                              | N L L N G F L K                                                             | 585  |
| KSR3-Nematostella-vectensis/1-640            | 629 ----                                                                              | Q S K L S F S T A P L                                                       | 640  |
| KSR3-Acropora-millepora/1-634                | 627 ----                                                                              | K I N T F S I K                                                             | 634  |
| KSR3-Priapulul-caudatus/1-533                | 528 ----                                                                              | W N H S Y P                                                                 | 533  |
| KSR3-Saccoglossus-kowaleskii/1-591           | 581 ----                                                                              | S S P T H L R S P W R                                                       | 591  |
| KSR3-Ptychodera-flava/1-629                  | 616 ----                                                                              | P S L S S P T H L R G Q W R                                                 | 629  |
| KSR3-Trichoplax-adherens/1-510               | -----                                                                                 |                                                                             |      |
| KSR3-Capitella-teleta/1-642                  | 637 ----                                                                              | S T K S I F                                                                 | 642  |
| KSR3-Eucidaris-tribuloides/1-545             | -----                                                                                 |                                                                             |      |
| KSR3-Strongylocentrotus-purpuratus/1-602     | 599 ----                                                                              | G L F R                                                                     | 602  |
| KSR3-Paracentrotus-lividus-RNAseq/1-600      | 597 ----                                                                              | G L F R                                                                     | 600  |
| KSR3-Notospermus-geniculatus/1-691           | 684 ----                                                                              | A R T G T M Y R                                                             | 691  |
| KSR3-Aplysia-californica/1-405               | 402 ----                                                                              | L F D V                                                                     | 405  |
| KSR3-Amphiura-filiformis-partial/1-642       | -----                                                                                 |                                                                             |      |
| KSR3-Platynereis-dumerilii/1-704             | 697 ----                                                                              | H K T T D F L S                                                             | 704  |
| KSR3-Patiria-miniata/1-779                   | 778 ----                                                                              | P W                                                                         | 779  |
| KSR3-Anneissia-japonica/1-590                | 586 ----                                                                              | P G R P W                                                                   | 590  |
| KSR3-Parastichopus-parvimensis-partial/1-330 | 323 ----                                                                              | S R P S W I S S                                                             | 330  |
